# Supplementary material for: Comparative genomics reveals the hybrid origin of a macaque group
Source: PubMed Central journal article supplement — Sci Adv. 2023 Jun 1;9(22):eadd3580. doi: 10.1126/sciadv.add3580 (PMC10413639; doi:10.1126/sciadv.add3580), 2023-06-01
Supplement: sciadv.add3580_sm.pdf [file sciadv.add3580_sm.pdf]

Supplementary Materials for  
**Comparative genomics reveals the hybrid origin of a macaque group**

Bao-Lin Zhang *et al.*

Corresponding author: Dong-Dong Wu, wudongdong@mail.kiz.ac.cn; Guojie Zhang, guojiezhang@zju.edu.cn;  
Yong-Tang Zheng, zhengyt@mail.kiz.ac.cn

*Sci. Adv.* **9**, eadd3580 (2023)  
DOI: 10.1126/sciadv.add3580

**This PDF file includes:**

Figs. S1 to S27  
Tables S1 to S17

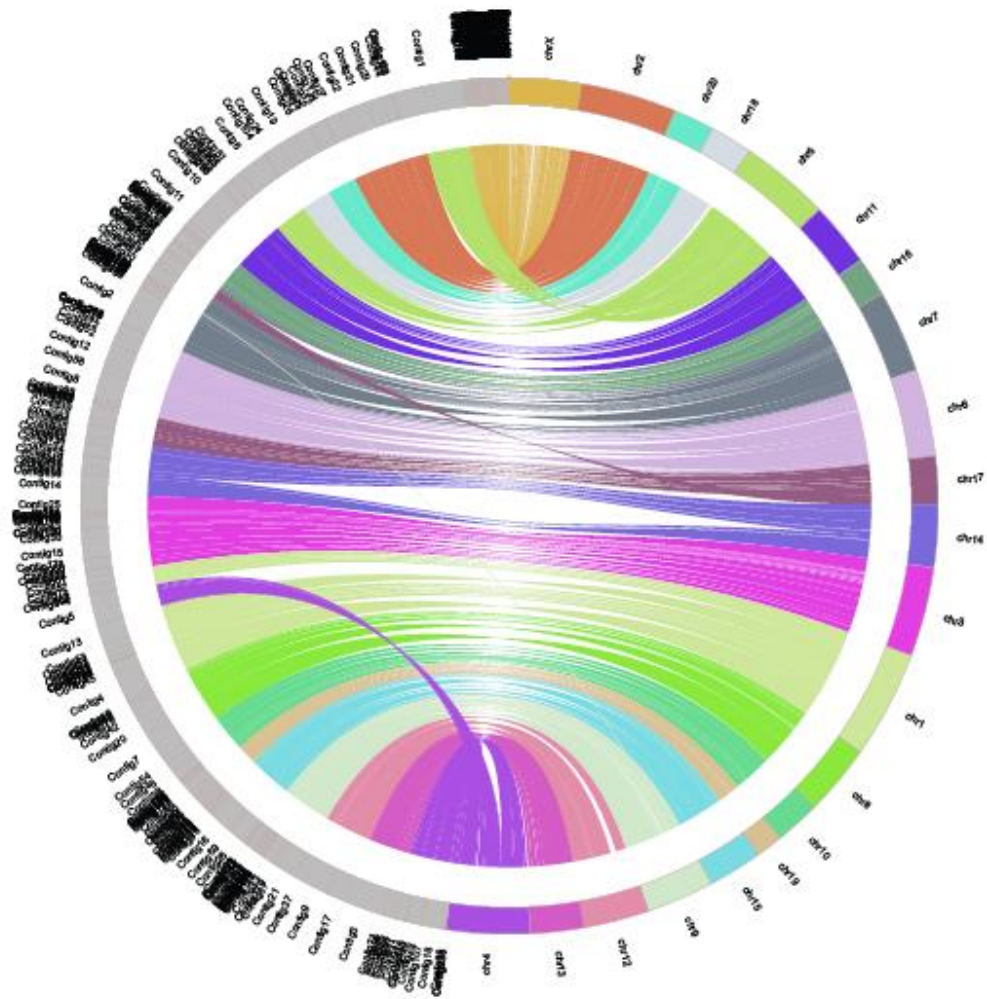

**Fig. S1.** An example showing the syntenic blocks between the stump-tailed macaque vs. Chinese rhesus macaque. Scaffolds larger than 10-kb were shown.

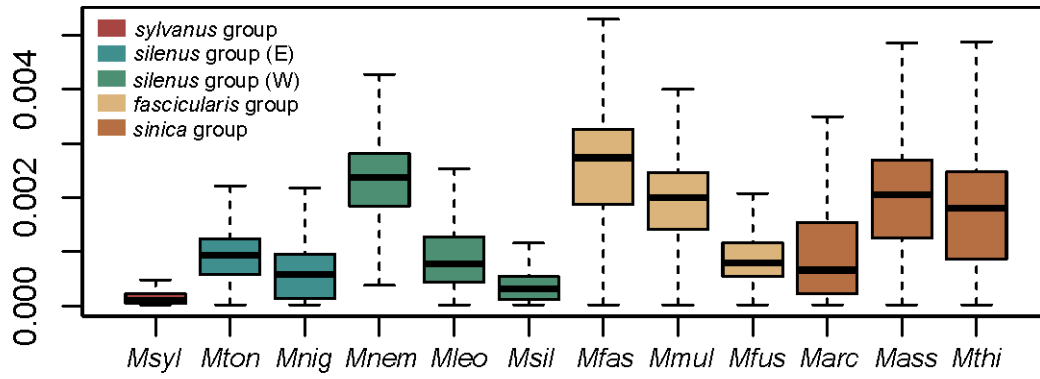

**Fig. S2. Genetic diversity for different macaque species.** Y-axis represents the ratio of average nucleotide differences between a pair of chromosomes in 50-kb windows. Species are abbreviated using the first letter of the genus name and the first three letters of the species name.

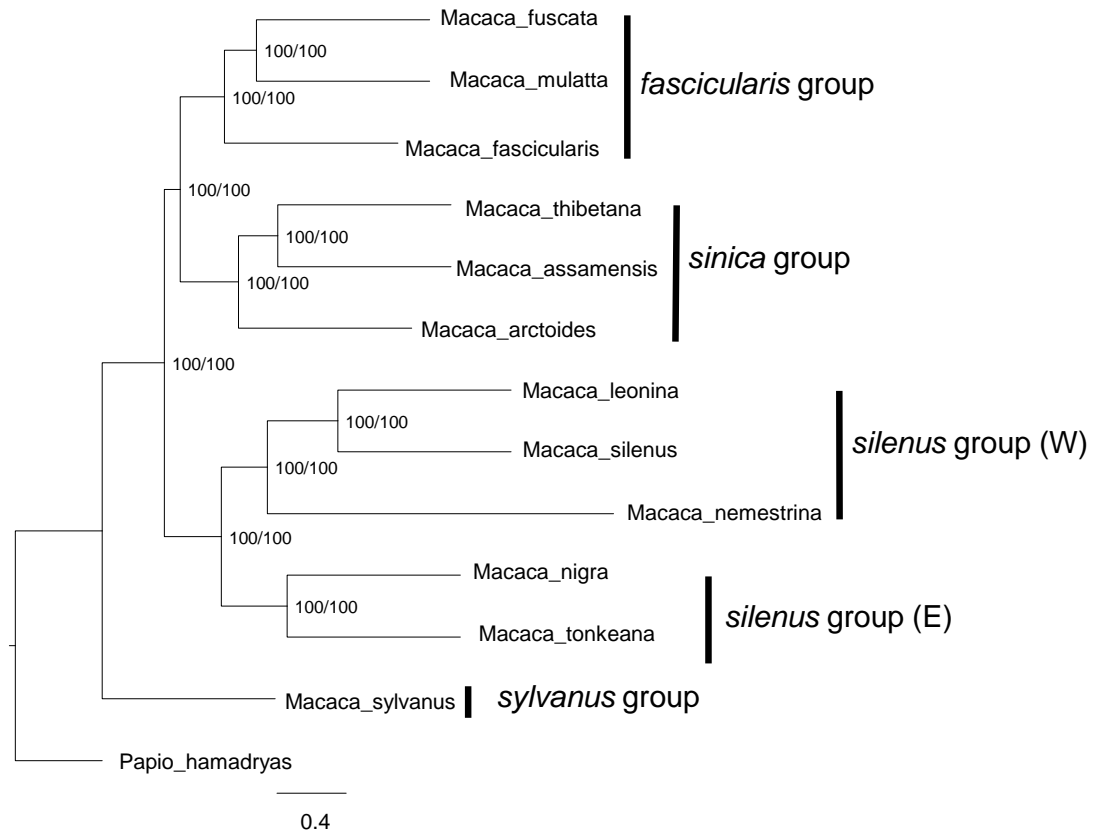

**Fig. S3. Coalescent-based phylogeny of macaques inferred from 50 kb genomic windows.** Branch lengths are in coalescent units as estimated by ASTRAL. Numbers at nodes refer to bootstrap values of ASTRAL and STAR, respectively.

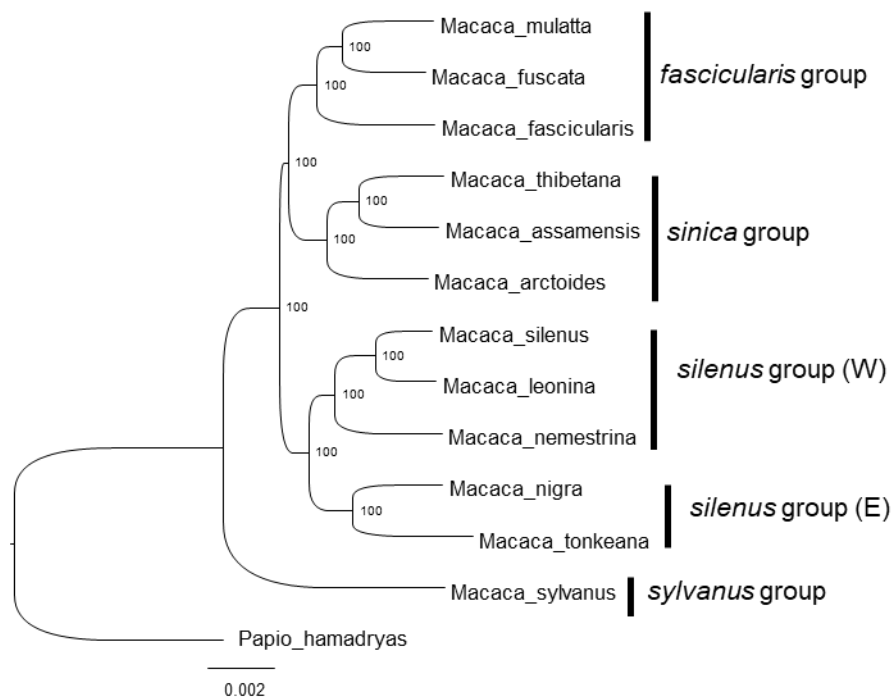

**Fig. S4. Maximum Likelihood (ML) tree inferred using concatenated four-fold degenerate sites (4d) sites.** We identified a total of 11,353 one-to-one orthologous genes and 4d sites were extracted and used to infer an ML phylogenetic tree by RAxML. Numbers beside nodes indicate bootstrap values.

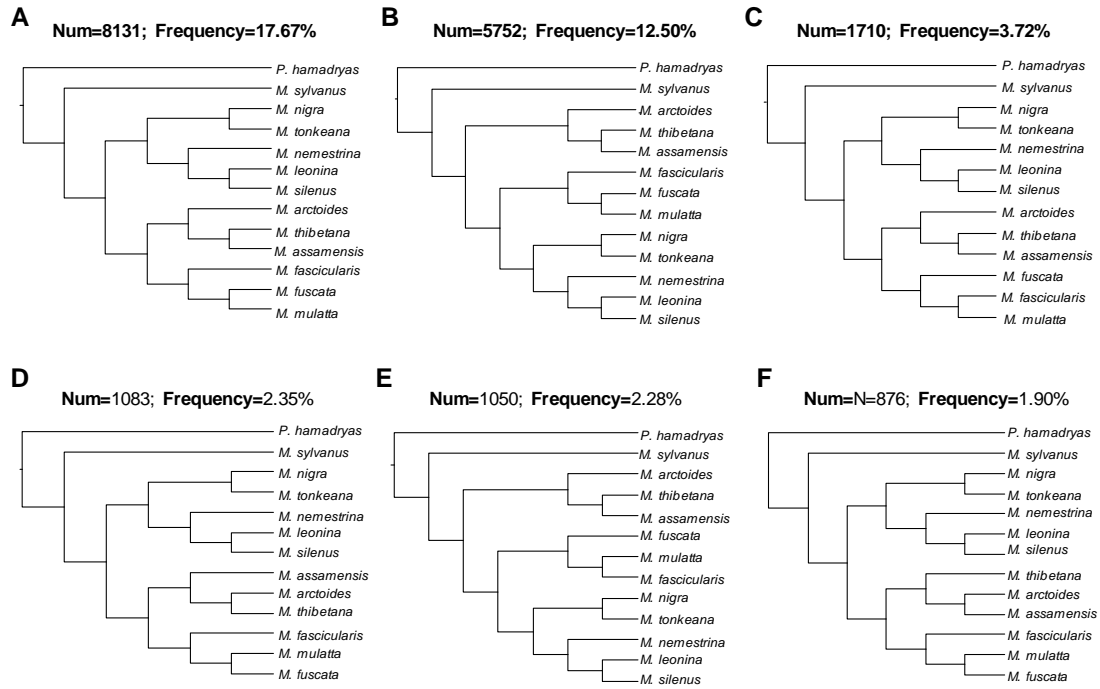

**Fig. S5.** The number and frequency of the six most common topologies amongst all 50-kb window trees (n=46,003 windows).

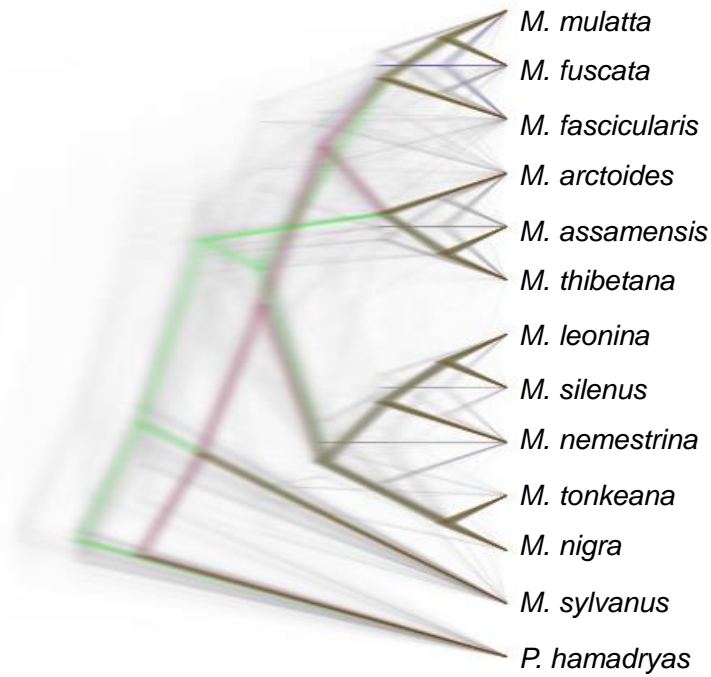

**Fig. S6. DensiTree plot for 20-kb window trees.** Topologies with mean bootstrap values below 80 have been removed, so that a total of 92,132 trees were retained in the results. The dark red, light green and purple colors represent the first, second and third most common topologies, respectively, whilst gray represents other topologies.

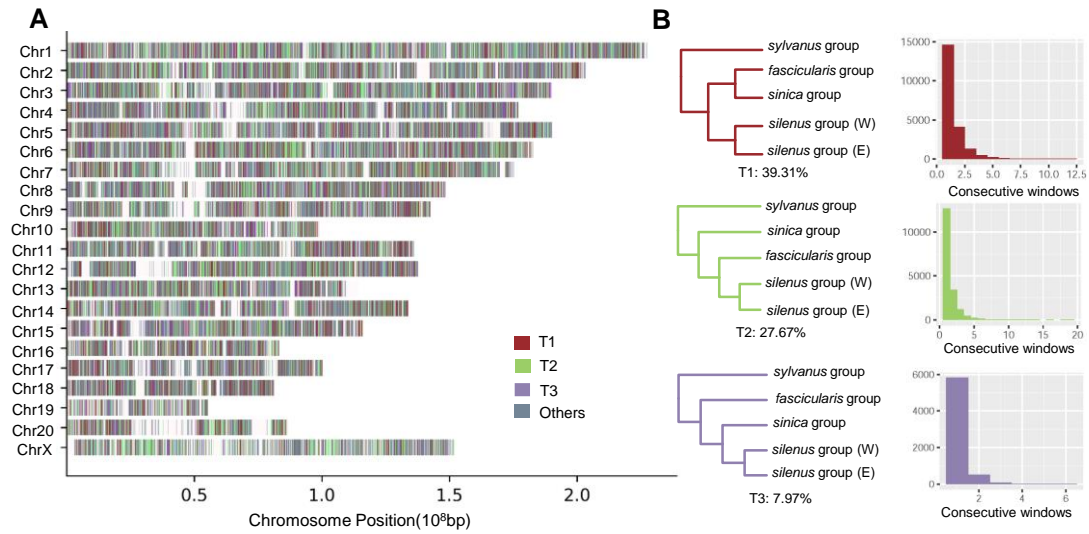

**Fig. S7. Heterogeneity of the phylogenetic signals using 20-kb window sequences.** (A) The distribution of the top three most common topologies by reference to the Chinese rhesus macaque (rheMacS) genome. White interval regions denote missing data. (B) The top three most common trees recovered by maximum likelihood analysis and the frequency of consecutive 20-kb windows with that topology. Values below the tree refer to the percentage of windows with that topology. The outgroup *Papio hamadryas* is not shown.



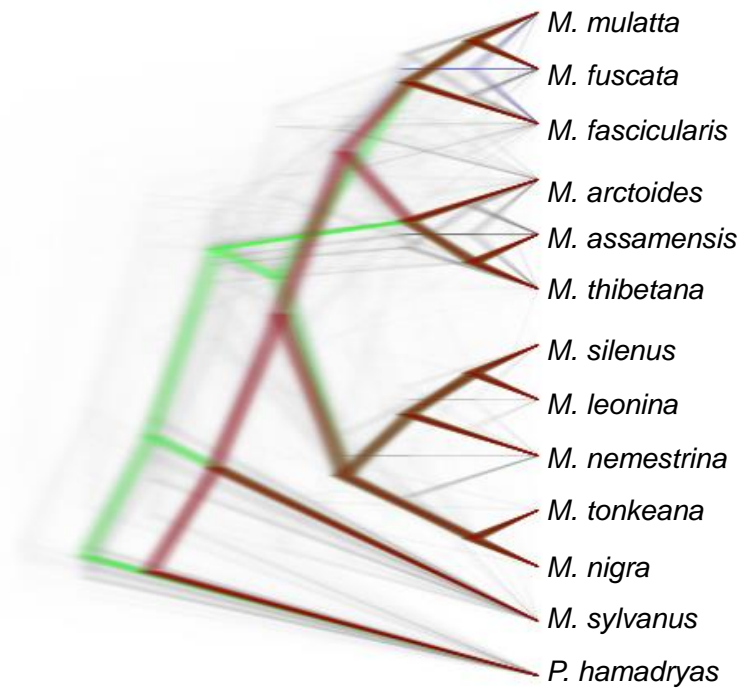

**Fig. S8. DensiTree plot for 100-kb window trees.** Topologies with mean bootstrap values below 80 have been removed, so that a total of 23,097 trees were retained in the results. The dark red, light green and purple colors represent the first, second and third most common topologies, respectively, whilst gray represents other topologies.

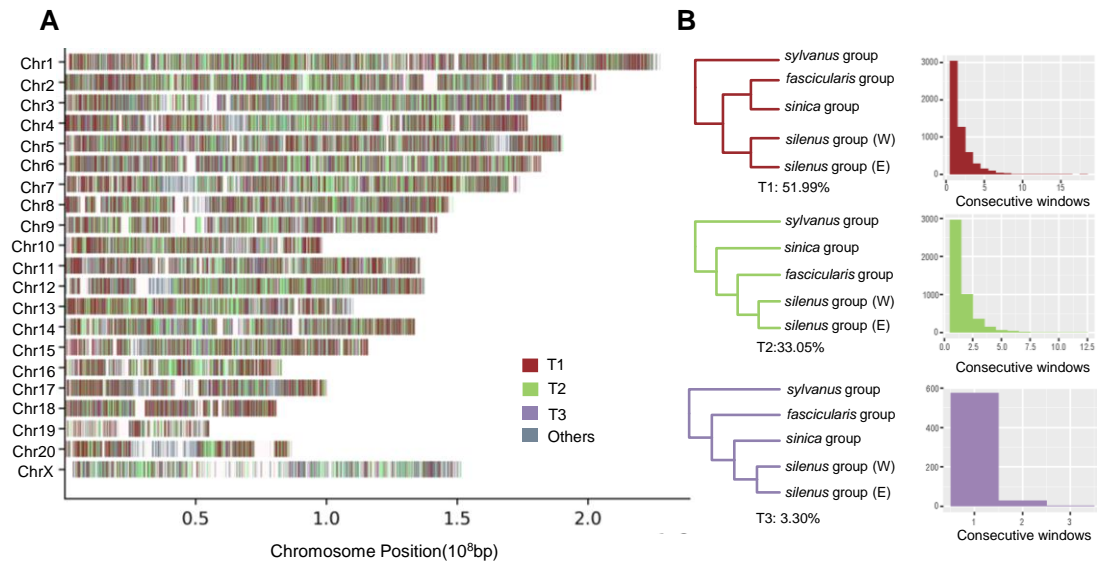

**Fig. S9. Heterogeneity of phylogenetic signals using 100-kb window sequences.** (A) The distribution of the three most common topologies by reference to the Chinese rhesus macaque (rheMacS) genome. White interval regions showing missing data. The outgroup *Papio hamadryas* is not shown. (B) The top three most common trees recovered by maximum likelihood analysis and the frequency of consecutive 100-kb windows with that topology. Values below the tree refer to the percentage of windows with that topology. The outgroup *Papio hamadryas* is not shown.

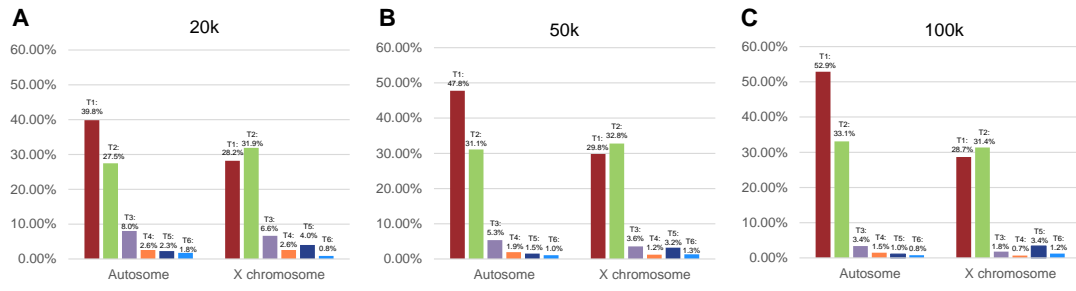

**Fig. S10. Proportion of the six most common topologies (T1-T6) recovered from autosomes and the X-chromosome for 20-kb, 50-kb and 100-kb window sizes, respectively.**

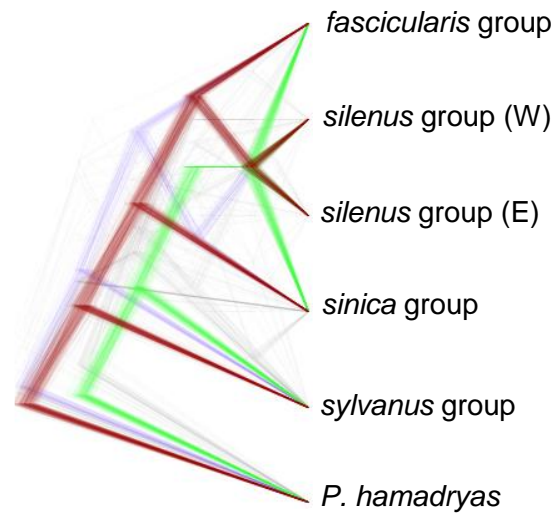

**Fig. S11. DensiTree plot for the major lineage relationships in the low 1% recombination regions.** The dark red color supports the sister relationship between the *fascicularis* group and the *sinica* group (tree1, 33.7 % of total), whereas the light green supports the sister relationship between the *fascicularis* group and the *silenus* group (tree2, 39.8% of total).

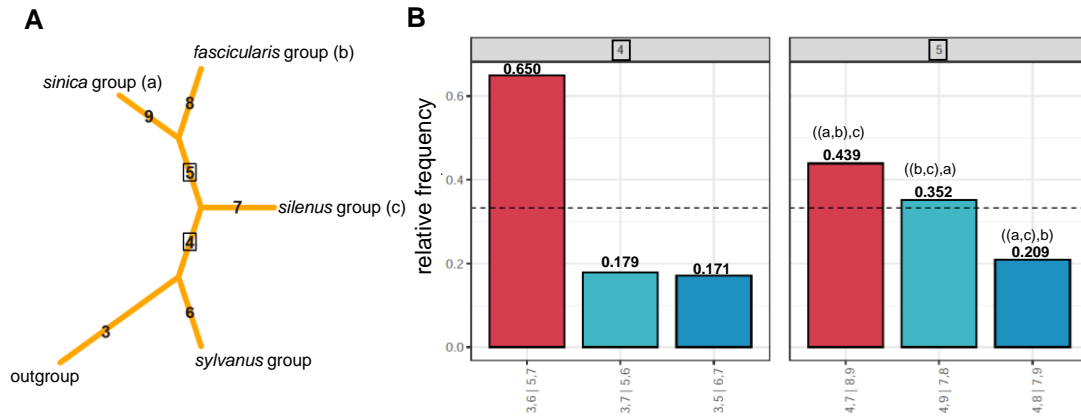

**Fig. S12. DiscoVista results estimate the frequency of all three possible topologies around the internal branches.** (A). The unrooted ASTRAL tree at species group level. Numbers on the tree refer to the branch number. The rectangle numbers refer to branches of interest in panel B. (B). Frequency of all three possible topologies around the interested internal branches. Each internal branch has four neighboring branches and could be used to represent all three possible topologies separated by “|”. The frequency of the main topology (consistent with the ASTRAL tree) is shown by a red bar, whereas the other two alternative topologies are depicted by blue bars. The dash line indicates the 1/3 threshold expected at random. The conflict relationships between the *fascicularis* group (b) and their two parental lineages, *sinica* (a), *silenus* (c), are also shown above the bar.

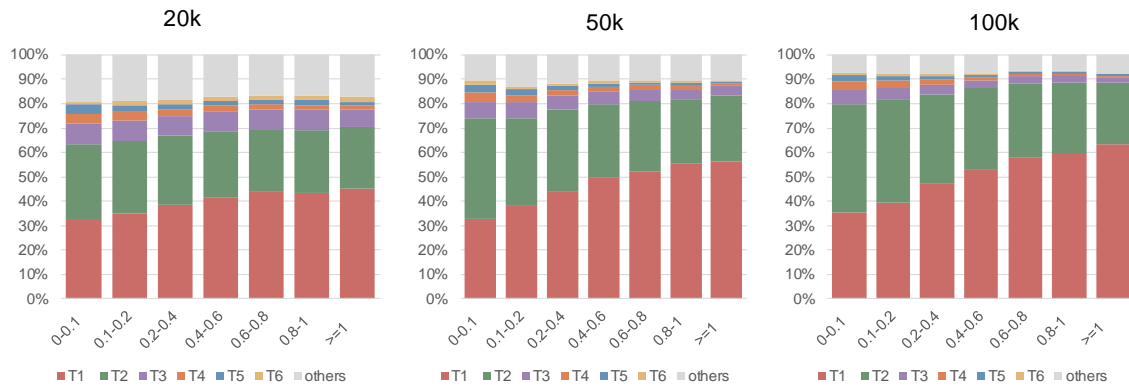

**Fig. S13. Proportion of the six most common topologies (T1-T6) stratified by the recombination rate (cM/Mb, x axis) for 20-kb, 50-kb and 100-kb window sizes, respectively.**

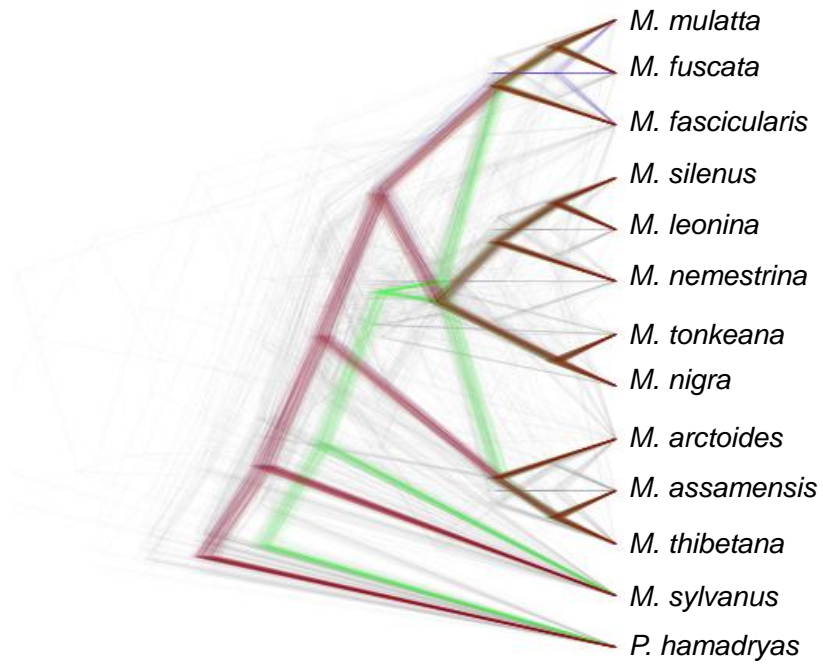

**Fig. S14. DensiTree plot for all species in the low 1% recombination regions.** The dark red, light green and purple colors represent the first, second and third most common topologies, respectively, whilst gray represents other topologies.

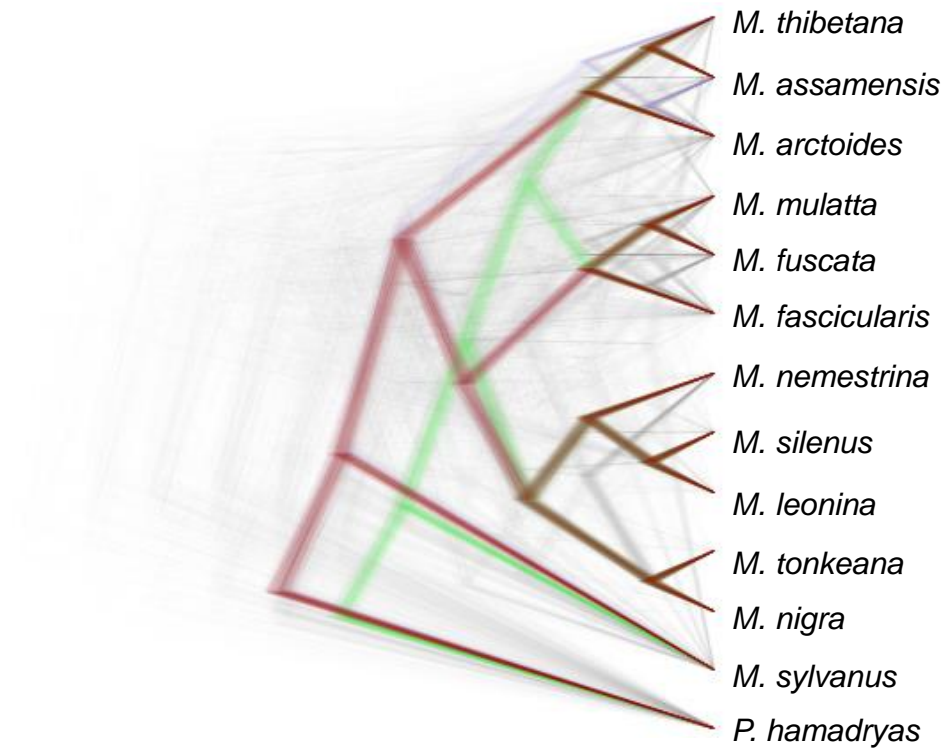

**Fig. S15. DensiTree plot for topologies in the X chromosome.** The dark red, light green and purple colors represent the first, second and third most common topologies, respectively, whilst gray represents other topologies.



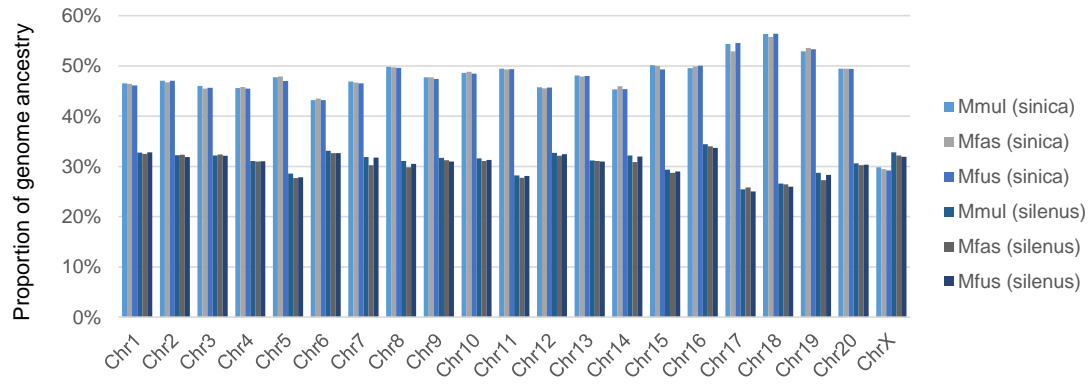

**Fig. S16. Proportion of genome ancestry of two parental lineage (*sinica* group and *silenus* group) in three hybrid species.** Mmul: *M. mulatta*; Mfas: *M. fascicularis* Mfus: *M. fuscata*.

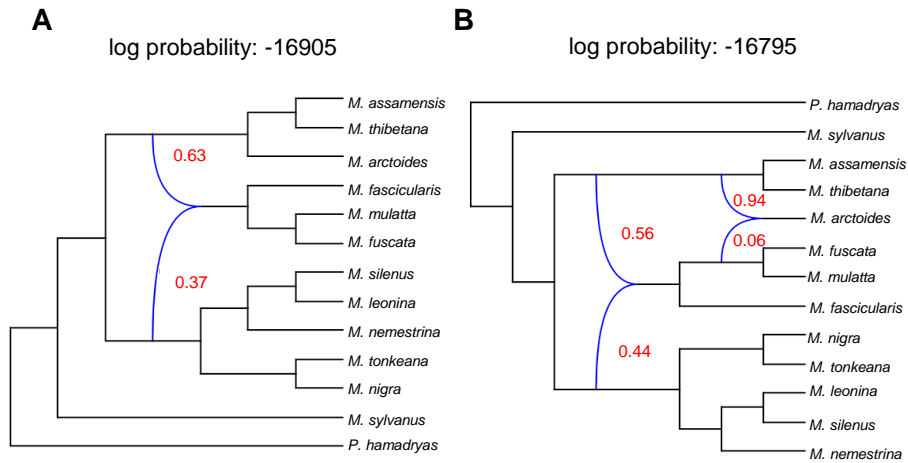

**Fig. S17. Phylogenetic network inferred from PhyloNet.** (A) reticulation=1; (B) reticulation=2. When more than 2 reticulation scenarios were applied, PhyloNet provided inconsistent inferences for the parental lineages involved in the reticulated evolutionary history due to excessively large search space under higher reticulation values. The blue line indicates reticulation and red numerical values indicate inheritance probabilities.

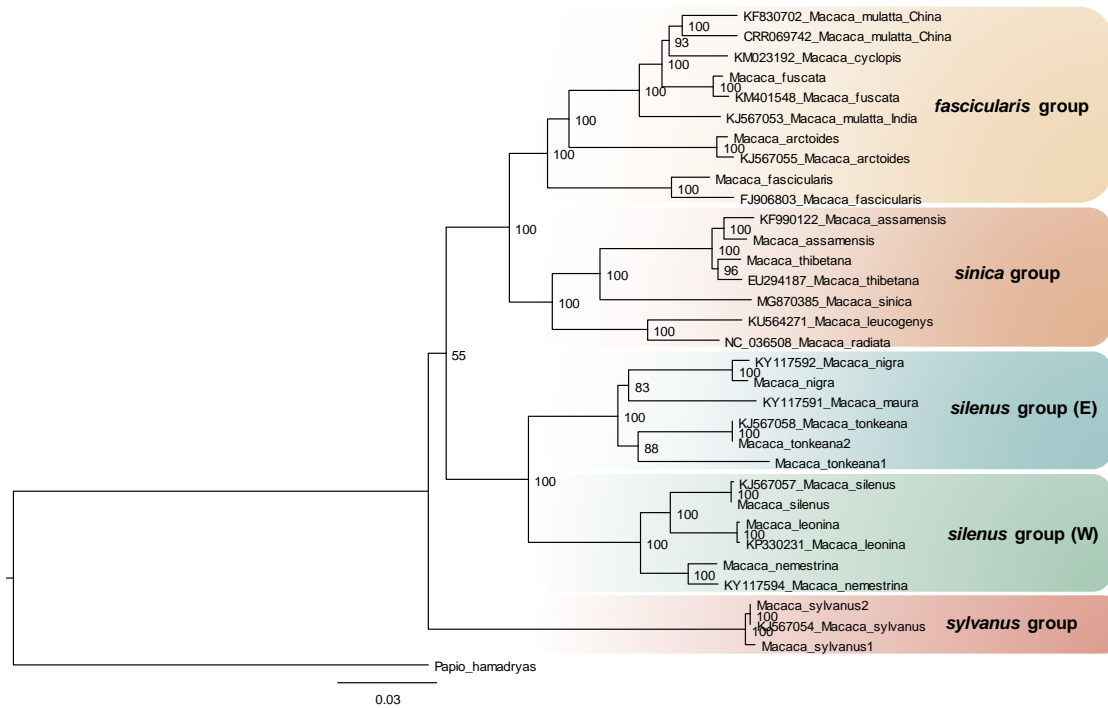

**Fig. S18. Mitochondrial genome tree inferred by RAxML.** Numbers beside nodes indicate bootstrap values. The labels with accession numbers refer to previously released mitochondrial genome sequences, whereas labels without an accession number refer to samples described in this study.

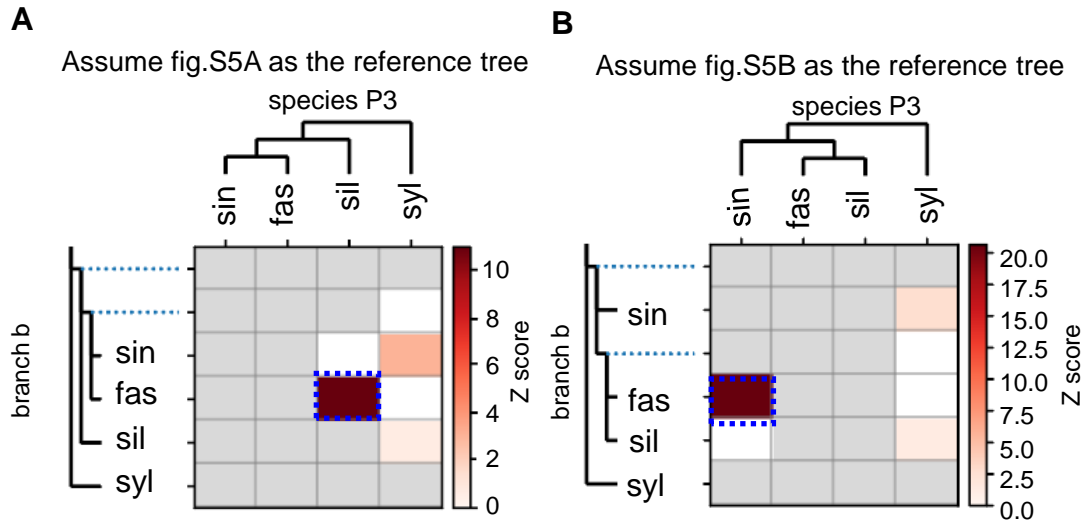

**Fig. S19. Heatmap showing statistical support for introgression between pairs of species groups based on (A) species group level tree referring to fig. S5A, and (B) fig. S5B, respectively.** Cells in the heatmap indicate the pairwise Z-score values between the branch b identified on the expanded tree on the Y axis (relative to its sister branch) and the taxa P3 identified on the X-axis (see Supplementary table S10-S11 for details of Z-score values). Cells having a Z-score >3 are highlighted with a blue rectangle. sin: *sinica* group; sil: *silenus* group; fas: *fascicularis* group; syl: *sylvanus* group.

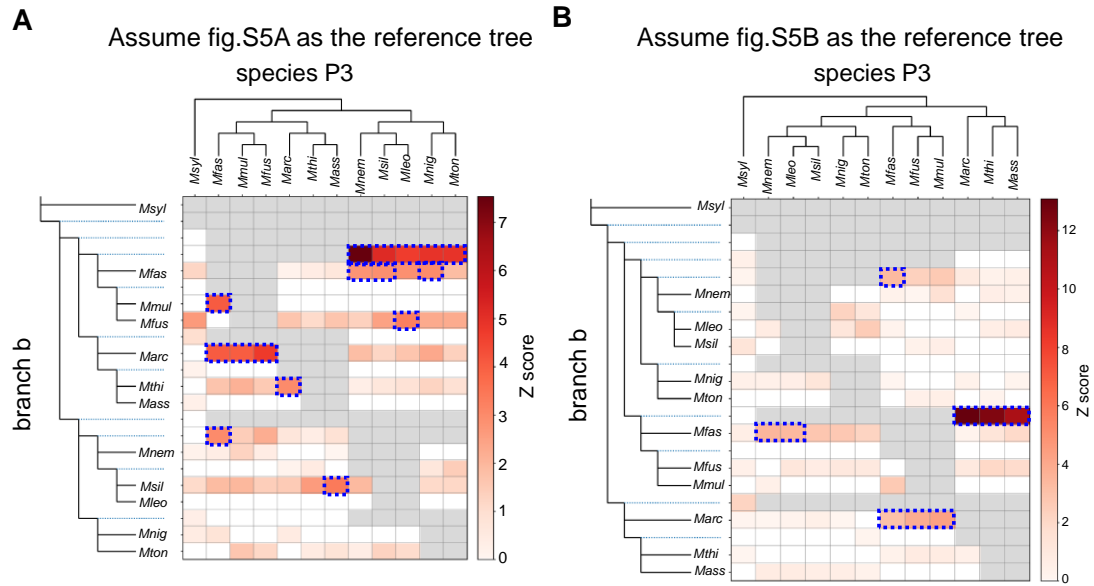

**Fig. S20.** Heatmap showing statistical support for introgression between pairs of species inferred from *Dsuit* package, assuming (A) fig. S5A and (B) fig. S5B as reference tree, respectively. Cells in the heatmap indicate the pairwise Z-score values between the branch b identified on the expanded tree on the Y axis (relative to its sister branch) and the species P3 identified on the X-axis (see Supplementary table S12 and S13 for details of Z-score values). Cells having a Z-score  $>3$  are highlighted with a blue rectangle.

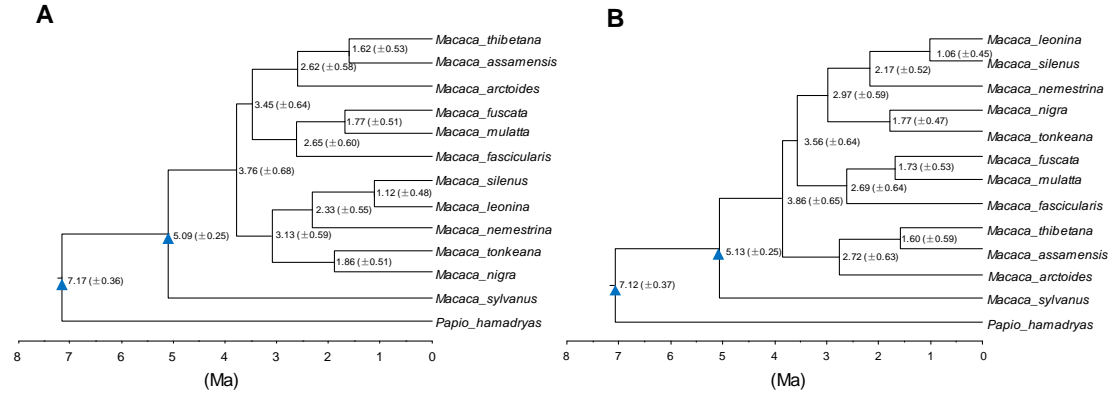

**Fig. S21.** The estimated divergence time for autosomal window sequences supporting **fig. 5A (left)** and **fig. 5B (right)**, respectively. Numbers at nodes refer to the average age (Ma)  $\pm$  1 standard deviation (SD). Blue triangles indicate fossil-based calibration points.

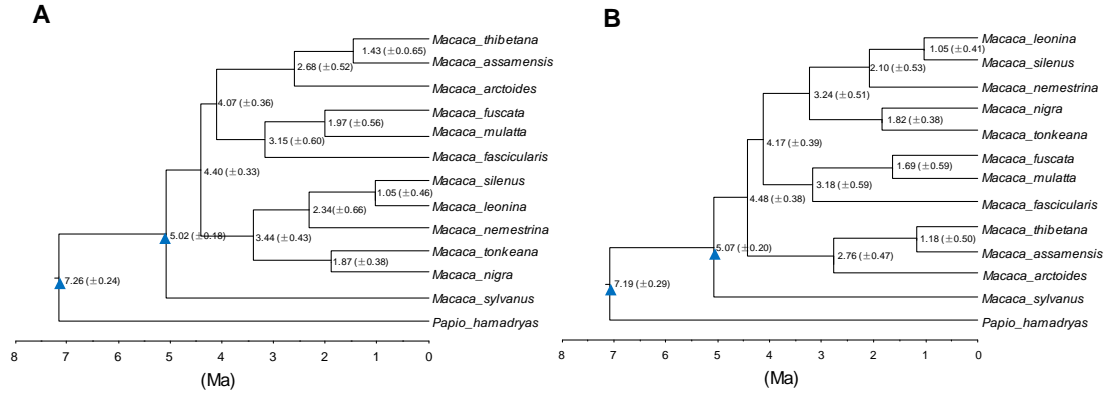

**Fig. S22.** The estimated divergence times for X-chromosome window sequences supporting **fig. 5A (left)** and **fig. 5B (right)**, respectively. Numbers at nodes refer to the average age (Ma)  $\pm$  1 standard deviation (SD). Blue triangles indicate fossil record-based calibration points

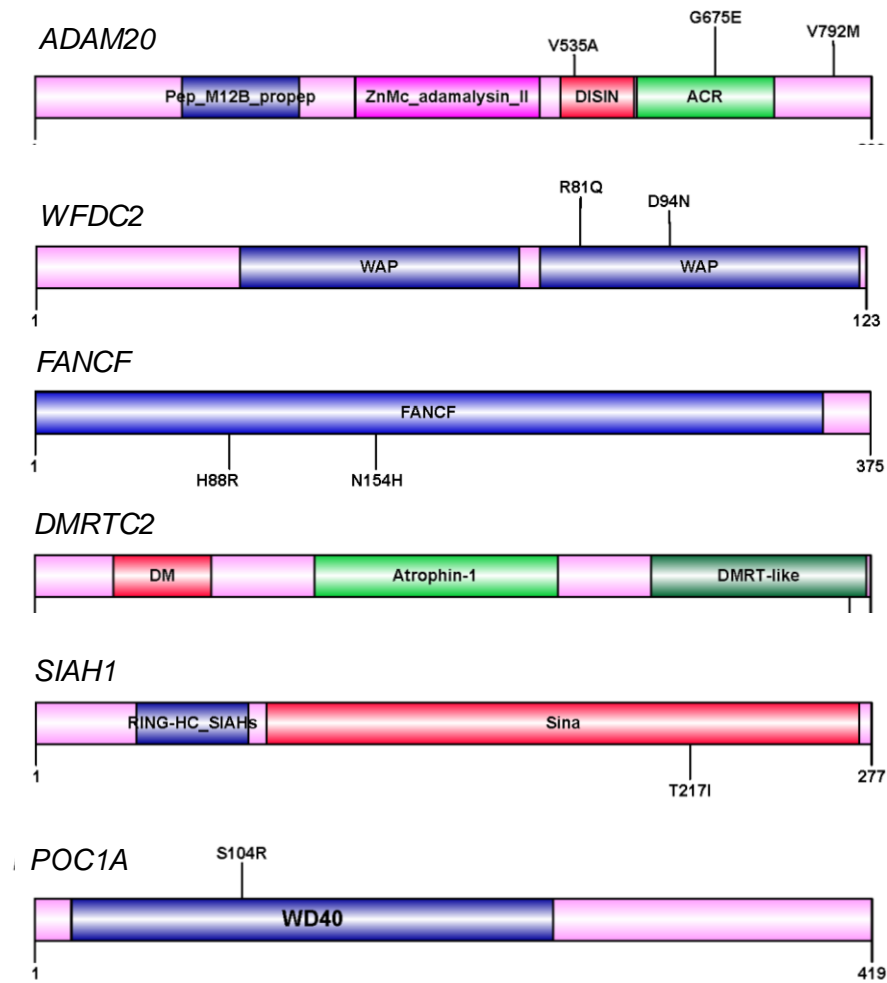

**Fig. S23.** The *sinica*-derived non-synonymous mutations occurring in the *fascicularis* group and their positions in relation to the functional domain regions predicted by NCBI's Conserved Domain Database.



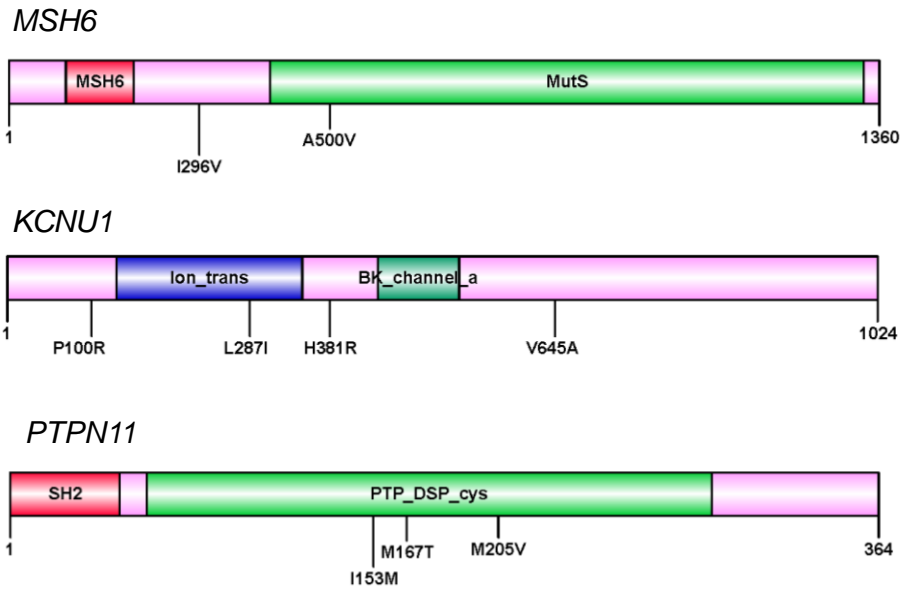

**Fig. S24.** The *silenus*-derived non-synonymous mutations occurring in the *fascicularis* group and their positions in relation to the functional domain regions predicted by NCBI's Conserved Domain Database.

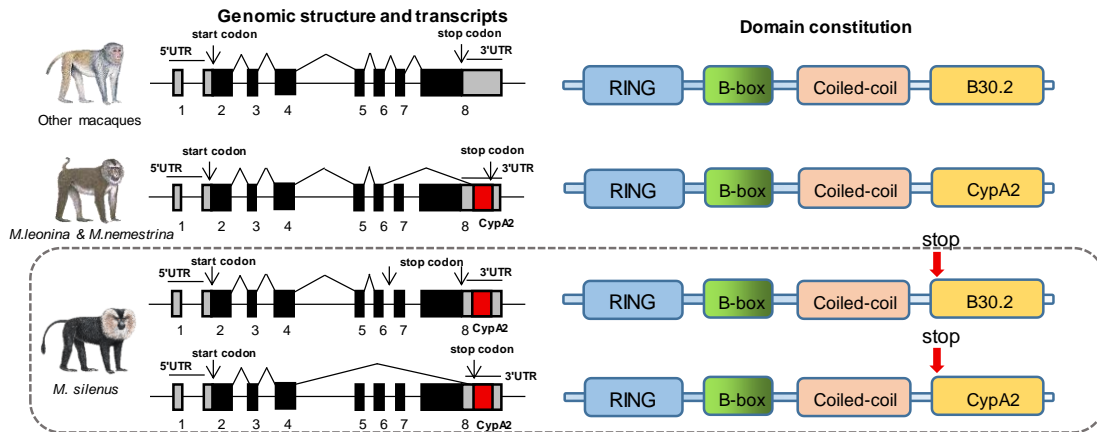

**Fig. S25. The genomic structure and alternative splicing isoforms of the *TRIM5* gene and *TRIM5-CypA* fusion genes.** The retrotranspositional insertion of a cyclophilin A2 (*CypA2*) gene into the 3' UTR region of the *TRIM5* locus was found in both pig-tailed macaques (*M. leonina* and *M. nemestrina*) and lion-tailed macaques (*M. silenus*), whereas other macaques (*M. mulatta* for example) lack this gene structure.

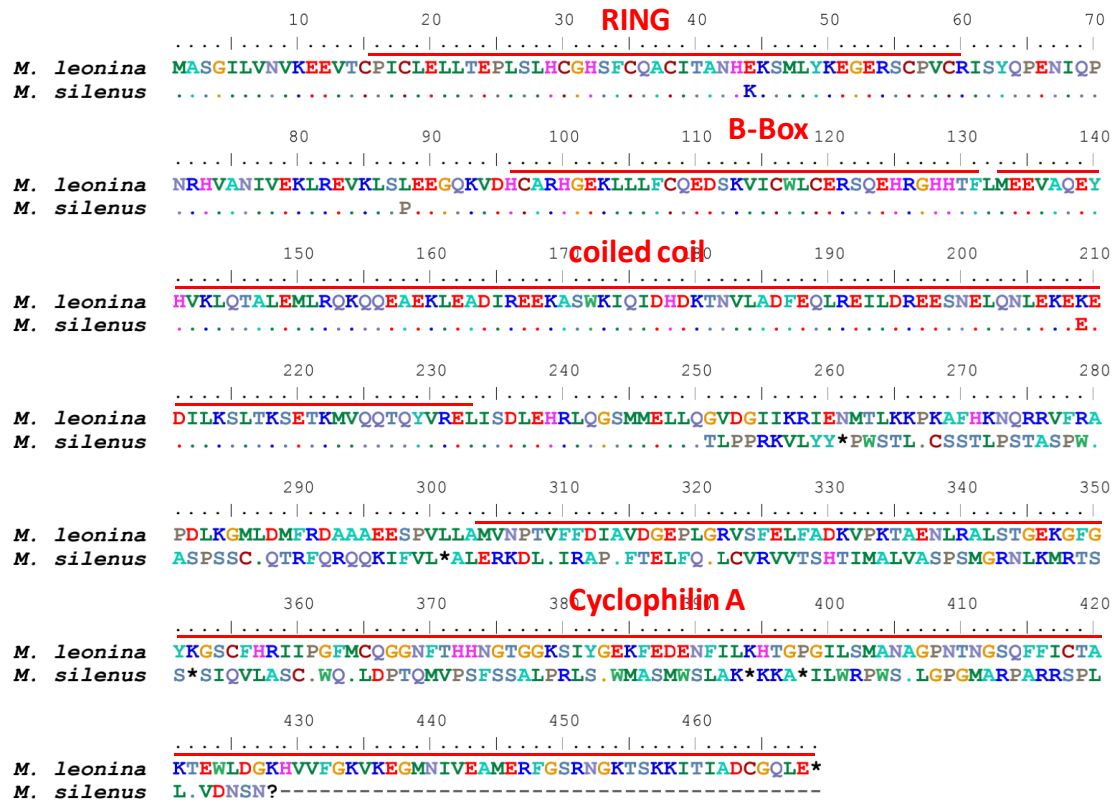

Fig. S26. Protein sequence alignment of *TRIMCyp* between the lion-tailed macaque (*M. silenus*) and the northern pig-tailed macaque (*M. leonina*). RING, B-Box, coiled coil, and cyclophilin A2 (*CypA2*) domains are shown.

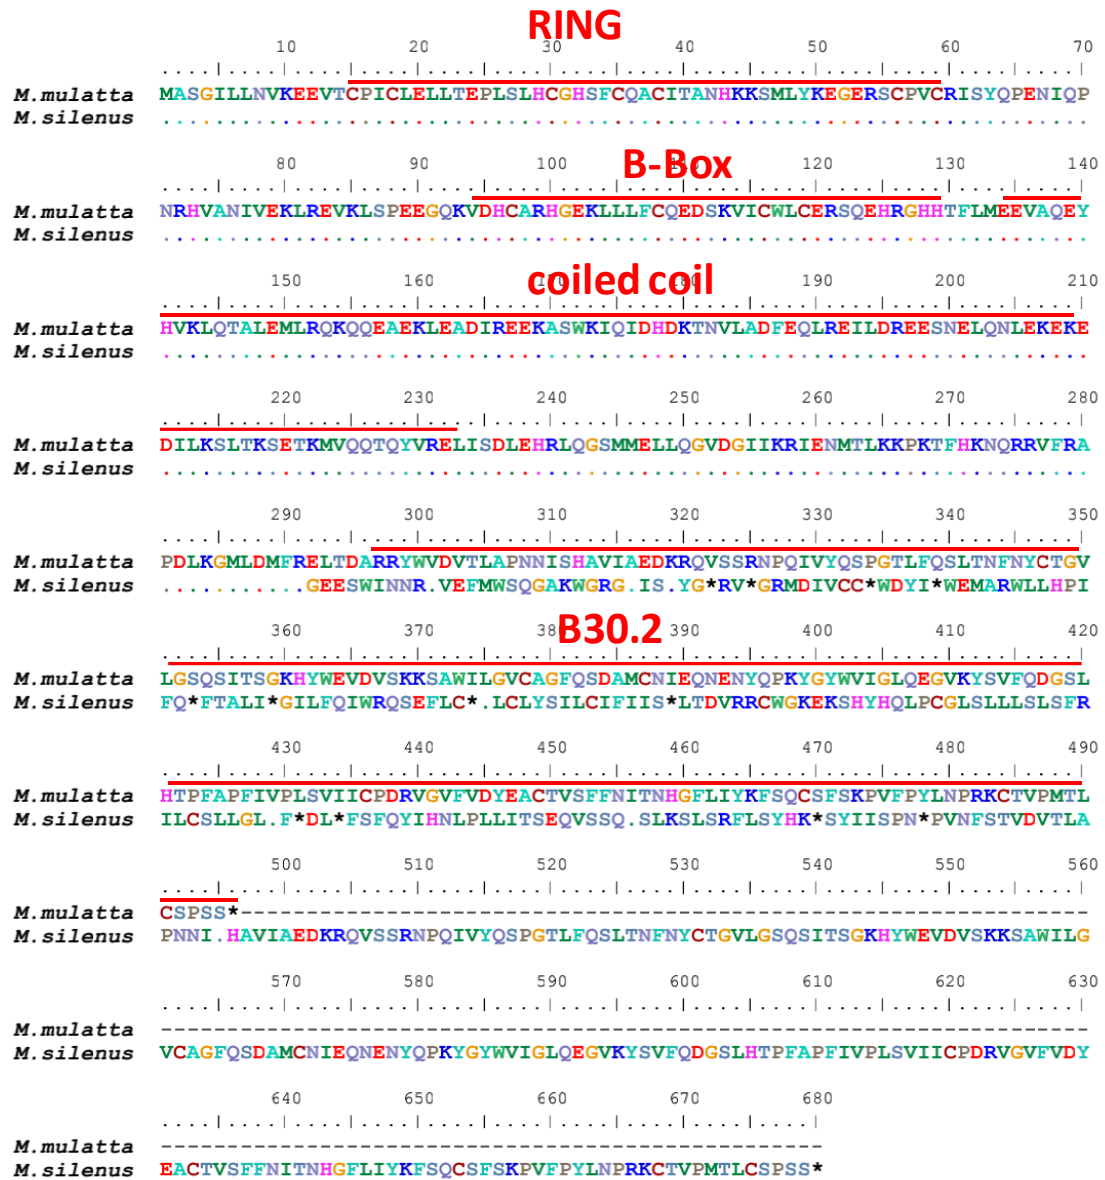

**Fig. S27. Protein sequence alignment of *TRIM5a* between the lion-tailed macaque (*M. silenus*) and the rhesus macaque (*M. mulatta*). RING, B-Box, coiled coil, and B30.2 domains are shown.**

**Table S1. Macaque sample and sequencing information.** In the "IUCN category" column, acronyms are as follows: "LC" for least concern, "NT" for near threatened, "VU" for vulnerable, "EN" for endangered, and "CR" for critically endangered. The sequencing platform and amount of data generated for each sample are also listed.

| Species name               | English name                | IUCN category | Sex    | Sample provider                        | Sample type | Sequencing platform and amount of data generated |
|----------------------------|-----------------------------|---------------|--------|----------------------------------------|-------------|--------------------------------------------------|
| <i>Macaca fuscata</i>      | Japanese Macaque            | LC            | Male   | Chengdu Zoo, China                     | Blood       | Nanopore: 151G; MGISEQ: 178G                     |
| <i>Macaca silenus</i>      | Lion-tailed Macaque         | EN            | Male   | Guangzhou Zoo, China                   | Blood       | Nanopore: 115G; MGISEQ: 166G                     |
| <i>Macaca thibetana</i>    | Tibetan Macaque             | NT            | Female | Guangzhou Zoo, China                   | Blood       | Nanopore: 147G; MGISEQ: 154G                     |
| <i>Macaca assamensis</i>   | Assamese Macaque            | NT            | Male   | Kunming Institute of Zoology, China    | Blood       | Nanopore: 177G; MGISEQ: 164G                     |
| <i>Macaca arctoides</i>    | Stump-tailed Macaque        | VU            | Male   | Kunming Institute of Zoology, China    | Blood       | Nanopore: 125G; MGISEQ: 152G                     |
| <i>Macaca fascicularis</i> | Long-tailed Macaque         | VU            | Male   | Kunming Institute of Zoology, China    | Blood       | Nanopore: 153G; MGISEQ: 171G                     |
| <i>Macaca leonina</i>      | Northern Pig-tailed Macaque | VU            | Male   | Kunming Institute of Zoology, China    | Blood       | Nanopore: 140G; MGISEQ: 163G                     |
| <i>Macaca nigra</i>        | Crested Macaque             | CR            | Female | Dublin Zoo, Ireland                    | DNA         | 10x genomics: 211G                               |
| <i>Macaca tonkeana</i>     | Tonkean Macaque             | VU            | Female | Silabe primate research center, France | DNA         | StLFR:270G                                       |
| <i>Macaca tonkeana2</i>    | Tonkean Macaque             | VU            | Male   | German Primate Center, German          | DNA         | NovaSeq 6000: 94G                                |
| <i>Macaca sylvanus</i>     | Barbary Macaque             | EN            | Female | Barcelona Zoo, Spain                   | DNA         | StLFR:274G                                       |
| <i>Macaca sylvanus2</i>    | Barbary Macaque             | EN            | Male   | German Primate Center, German          | DNA         | NovaSeq 6000: 96G                                |

**Table S2. Genome statistics for the ten newly sequenced macaque genomes.** The corresponding assembly strategy and number of annotated genes are also given.

| Species name               | Contig N50 (bp) | Scaffold N50 (bp) | Assembled Genome Size (bp) | Software           | Gene Number |
|----------------------------|-----------------|-------------------|----------------------------|--------------------|-------------|
| <i>Macaca assamensis</i>   | 27,348,716      | 27,348,716        | 2,759,375,986              | NextDenovo + wtdbg | 20960       |
| <i>Macaca silenus</i>      | 25,691,658      | 25,691,658        | 2,778,791,713              | NextDenovo + wtdbg | 20689       |
| <i>Macaca arctoides</i>    | 30,155,229      | 30,155,229        | 2,753,320,893              | NextDenovo + wtdbg | 20821       |
| <i>Macaca thibetana</i>    | 33,225,245      | 33,225,245        | 2,775,160,973              | NextDenovo + wtdbg | 20838       |
| <i>Macaca fascicularis</i> | 21,239,021      | 21,239,021        | 2,770,900,045              | NextDenovo + wtdbg | 20502       |
| <i>Macaca fuscata</i>      | 26,406,092      | 26,406,092        | 2,748,481,177              | NextDenovo + wtdbg | 20992       |
| <i>Macaca leonina</i>      | 17,711,378      | 17,711,378        | 2,808,882,299              | NextDenovo + wtdbg | 20662       |
| <i>Macaca nigra</i>        | 76,310          | 26,144,792        | 2,973,416,866              | Supernova          | 21811       |
| <i>Macaca tonkeana</i>     | 50,863          | 21,105,068        | 3,004,470,813              | Supernova          | 21194       |
| <i>Macaca sylvanus</i>     | 58,539          | 22,820,170        | 2,992,556,657              | Supernova          | 21533       |

**Table S3. Genome completeness assessed by BUSCO (version 2.0), referring to the mammalia odb9 BUSCO set.**

| <b>Species name</b>        | <b>Ratio (%)</b> |
|----------------------------|------------------|
| <i>Macaca assamensis</i>   | 94.2             |
| <i>Macaca silenus</i>      | 94.4             |
| <i>Macaca arctoides</i>    | 94.4             |
| <i>Macaca thibetana</i>    | 93.7             |
| <i>Macaca fascicularis</i> | 93.7             |
| <i>Macaca fuscata</i>      | 94.5             |
| <i>Macaca leonina</i>      | 94.0             |
| <i>Macaca nigra</i>        | 93.2             |
| <i>Macaca tonkeana</i>     | 93.1             |
| <i>Macaca sylvanus</i>     | 93.3             |

**Table S4. Repeat content of the assembled macaque genomes.**

| <b>Species name</b>        | <b>DNA ratio</b> | <b>LINE ratio</b> | <b>SINE ratio</b> | <b>LTR ratio</b> | <b>Unknown ratio</b> |
|----------------------------|------------------|-------------------|-------------------|------------------|----------------------|
| <i>Macaca assamensis</i>   | 2.70             | 22.41             | 13.56             | 7.83             | 0.20                 |
| <i>Macaca silenus</i>      | 3.00             | 22.08             | 13.67             | 7.53             | 0.40                 |
| <i>Macaca arctoides</i>    | 3.19             | 22.05             | 13.71             | 7.73             | 0.48                 |
| <i>Macaca thibetana</i>    | 2.75             | 19.71             | 13.97             | 7.30             | 0.19                 |
| <i>Macaca fascicularis</i> | 2.69             | 20.51             | 13.17             | 7.73             | 0.45                 |
| <i>Macaca fuscata</i>      | 2.87             | 21.18             | 13.47             | 7.82             | 0.51                 |
| <i>Macaca leonina</i>      | 2.81             | 19.13             | 13.44             | 8.20             | 0.15                 |
| <i>Macaca nigra</i>        | 1.43             | 14.89             | 10.02             | 5.34             | 0.02                 |
| <i>Macaca tonkeana</i>     | 1.44             | 14.46             | 9.77              | 5.38             | 0.03                 |
| <i>Macaca sylvanus</i>     | 1.43             | 14.48             | 9.84              | 5.19             | 0.02                 |

**Table S5. Proportion of aligned base-pairs by reference to the Chinese rhesus macaque (*M. mulatta*) assembly.**

| <b>Species name</b>        | <b>Mapping ratio</b> |
|----------------------------|----------------------|
| <i>Macaca fascicularis</i> | 93.6703              |
| <i>Macaca silenus</i>      | 93.3064              |
| <i>Macaca leonina</i>      | 93.6334              |
| <i>Macaca assamensis</i>   | 93.2924              |
| <i>Macaca nemestrina</i>   | 91.6092              |
| <i>Macaca nigra</i>        | 93.0378              |
| <i>Macaca sylvanus</i>     | 91.9538              |
| <i>Macaca tonkeana</i>     | 92.3328              |
| <i>Macaca fuscata</i>      | 93.6078              |
| <i>Macaca thibetana</i>    | 92.6400              |
| <i>Macaca arctoides</i>    | 93.2079              |
| <i>Papio hamadryas</i>     | 90.1235              |



**Table S6. HyDe results of all combinations of species groups with Z-score >3.** The statistic Gamma equals 0.5 means 50:50 hybrid, whilst values close to 0 or 1 indicate a low level of asymmetrical admixture by introgression. GammaP1 and GammaP2 denote the inheritance probabilities from parental species P1 and P2, respectively.

| <b>P1</b>           | <b>Hybrid</b>       | <b>P2</b>       | <b>Z-score</b> | <b>P-value</b> | <b>GammaP1</b> | <b>GammaP2</b> |
|---------------------|---------------------|-----------------|----------------|----------------|----------------|----------------|
| <i>sinica</i>       | <i>fascicularis</i> | <i>silenus</i>  | 175.1070       | ~0.0           | 0.6447         | 0.3553         |
| <i>fascicularis</i> | <i>sinica</i>       | <i>sylvanus</i> | 69.2458        | ~0.0           | 0.9643         | 0.0357         |
| <i>silenus</i>      | <i>sinica</i>       | <i>sylvanus</i> | 62.7978        | ~0.0           | 0.9551         | 0.0449         |
| <i>fascicularis</i> | <i>silenus</i>      | <i>sylvanus</i> | 3.7485         | 0.0001         | 0.9978         | 0.0022         |

**Table S7. HyDe results showing the combination of Z-score >3 and Gamma values ranged from 0.05 to 0.95.** Extremely low level admixture signatures (gamma<0.05 and gamma>0.95) were not considered. GammaP1 and GammaP2 denote the inheritance probabilities from parental species P1 and P2, respectively.

| <b>P1</b>              | <b>Hybrid</b>          | <b>P2</b>              | <b>Z-score</b> | <b>P-value</b> | <b>GammaP1</b> | <b>GammaP2</b> |
|------------------------|------------------------|------------------------|----------------|----------------|----------------|----------------|
| <i>M. fascicularis</i> | <i>M. arctoides</i>    | <i>M. thibetana</i>    | 98.70          | ~0.0           | 0.05           | 0.95           |
| <i>M. fascicularis</i> | <i>M. arctoides</i>    | <i>M. assamensis</i>   | 103.95         | ~0.0           | 0.05           | 0.95           |
| <i>M. mulatta</i>      | <i>M. arctoides</i>    | <i>M. thibetana</i>    | 120.55         | ~0.0           | 0.06           | 0.94           |
| <i>M. mulatta</i>      | <i>M. arctoides</i>    | <i>M. assamensis</i>   | 131.39         | ~0.0           | 0.07           | 0.93           |
| <i>M. fuscata</i>      | <i>M. arctoides</i>    | <i>M. thibetana</i>    | 142.91         | ~0.0           | 0.08           | 0.92           |
| <i>M. fuscata</i>      | <i>M. arctoides</i>    | <i>M. assamensis</i>   | 158.21         | ~0.0           | 0.09           | 0.91           |
| <i>M. sylvanus</i>     | <i>M. assamensis</i>   | <i>M. leonina</i>      | 70.73          | ~0.0           | 0.05           | 0.95           |
| <i>M. sylvanus</i>     | <i>M. assamensis</i>   | <i>M. silenus</i>      | 73.31          | ~0.0           | 0.05           | 0.95           |
| <i>M. arctoides</i>    | <i>M. fascicularis</i> | <i>M. silenus</i>      | 194.90         | ~0.0           | 0.65           | 0.35           |
| <i>M. tonkeana</i>     | <i>M. fascicularis</i> | <i>M. assamensis</i>   | 194.94         | ~0.0           | 0.41           | 0.59           |
| <i>M. arctoides</i>    | <i>M. fascicularis</i> | <i>M. nigra</i>        | 194.98         | ~0.0           | 0.67           | 0.33           |
| <i>M. arctoides</i>    | <i>M. fascicularis</i> | <i>M. tonkeana</i>     | 195.07         | ~0.0           | 0.67           | 0.33           |
| <i>M. tonkeana</i>     | <i>M. fascicularis</i> | <i>M. thibetana</i>    | 195.09         | ~0.0           | 0.41           | 0.59           |
| <i>M. nigra</i>        | <i>M. fascicularis</i> | <i>M. thibetana</i>    | 195.82         | ~0.0           | 0.40           | 0.60           |
| <i>M. nigra</i>        | <i>M. fascicularis</i> | <i>M. assamensis</i>   | 196.00         | ~0.0           | 0.41           | 0.59           |
| <i>M. nemestrina</i>   | <i>M. fascicularis</i> | <i>M. assamensis</i>   | 197.10         | ~0.0           | 0.47           | 0.53           |
| <i>M. arctoides</i>    | <i>M. fascicularis</i> | <i>M. leonina</i>      | 197.98         | ~0.0           | 0.65           | 0.35           |
| <i>M. nemestrina</i>   | <i>M. fascicularis</i> | <i>M. thibetana</i>    | 199.84         | ~0.0           | 0.47           | 0.53           |
| <i>M. silenus</i>      | <i>M. fascicularis</i> | <i>M. thibetana</i>    | 200.44         | ~0.0           | 0.43           | 0.57           |
| <i>M. leonina</i>      | <i>M. fascicularis</i> | <i>M. assamensis</i>   | 200.88         | ~0.0           | 0.44           | 0.56           |
| <i>M. leonina</i>      | <i>M. fascicularis</i> | <i>M. thibetana</i>    | 201.06         | ~0.0           | 0.44           | 0.56           |
| <i>M. silenus</i>      | <i>M. fascicularis</i> | <i>M. assamensis</i>   | 201.66         | ~0.0           | 0.43           | 0.57           |
| <i>M. arctoides</i>    | <i>M. fascicularis</i> | <i>M. nemestrina</i>   | 208.12         | ~0.0           | 0.62           | 0.38           |
| <i>M. arctoides</i>    | <i>M. fuscata</i>      | <i>M. silenus</i>      | 162.00         | ~0.0           | 0.74           | 0.26           |
| <i>M. arctoides</i>    | <i>M. fuscata</i>      | <i>M. leonina</i>      | 162.74         | ~0.0           | 0.74           | 0.26           |
| <i>M. arctoides</i>    | <i>M. fuscata</i>      | <i>M. tonkeana</i>     | 163.58         | ~0.0           | 0.75           | 0.25           |
| <i>M. arctoides</i>    | <i>M. fuscata</i>      | <i>M. nigra</i>        | 165.58         | ~0.0           | 0.75           | 0.25           |
| <i>M. nemestrina</i>   | <i>M. fuscata</i>      | <i>M. assamensis</i>   | 168.73         | ~0.0           | 0.40           | 0.60           |
| <i>M. arctoides</i>    | <i>M. fuscata</i>      | <i>M. nemestrina</i>   | 169.32         | ~0.0           | 0.73           | 0.27           |
| <i>M. tonkeana</i>     | <i>M. fuscata</i>      | <i>M. assamensis</i>   | 170.51         | ~0.0           | 0.36           | 0.64           |
| <i>M. tonkeana</i>     | <i>M. fuscata</i>      | <i>M. thibetana</i>    | 171.06         | ~0.0           | 0.35           | 0.65           |
| <i>M. nemestrina</i>   | <i>M. fuscata</i>      | <i>M. thibetana</i>    | 172.06         | ~0.0           | 0.39           | 0.61           |
| <i>M. nigra</i>        | <i>M. fuscata</i>      | <i>M. assamensis</i>   | 173.01         | ~0.0           | 0.37           | 0.63           |
| <i>M. nigra</i>        | <i>M. fuscata</i>      | <i>M. thibetana</i>    | 173.25         | ~0.0           | 0.35           | 0.65           |
| <i>M. leonina</i>      | <i>M. fuscata</i>      | <i>M. assamensis</i>   | 174.65         | ~0.0           | 0.39           | 0.61           |
| <i>M. leonina</i>      | <i>M. fuscata</i>      | <i>M. thibetana</i>    | 175.05         | ~0.0           | 0.38           | 0.62           |
| <i>M. silenus</i>      | <i>M. fuscata</i>      | <i>M. thibetana</i>    | 176.09         | ~0.0           | 0.37           | 0.63           |
| <i>M. silenus</i>      | <i>M. fuscata</i>      | <i>M. assamensis</i>   | 176.82         | ~0.0           | 0.39           | 0.61           |
| <i>M. fuscata</i>      | <i>M. mulatta</i>      | <i>M. fascicularis</i> | 77.23          | ~0.0           | 0.90           | 0.10           |
| <i>M. arctoides</i>    | <i>M. mulatta</i>      | <i>M. silenus</i>      | 128.33         | ~0.0           | 0.75           | 0.25           |
| <i>M. arctoides</i>    | <i>M. mulatta</i>      | <i>M. leonina</i>      | 134.02         | ~0.0           | 0.74           | 0.26           |
| <i>M. arctoides</i>    | <i>M. mulatta</i>      | <i>M. tonkeana</i>     | 142.84         | ~0.0           | 0.74           | 0.26           |
| <i>M. arctoides</i>    | <i>M. mulatta</i>      | <i>M. nigra</i>        | 146.78         | ~0.0           | 0.73           | 0.27           |
| <i>M. silenus</i>      | <i>M. mulatta</i>      | <i>M. thibetana</i>    | 146.82         | ~0.0           | 0.36           | 0.64           |

|                      |                     |                      |        |      |      |      |
|----------------------|---------------------|----------------------|--------|------|------|------|
| <i>M. silenus</i>    | <i>M. mulatta</i>   | <i>M. assamensis</i> | 149.54 | ~0.0 | 0.37 | 0.63 |
| <i>M. leonina</i>    | <i>M. mulatta</i>   | <i>M. thibetana</i>  | 149.85 | ~0.0 | 0.37 | 0.63 |
| <i>M. leonina</i>    | <i>M. mulatta</i>   | <i>M. assamensis</i> | 151.17 | ~0.0 | 0.39 | 0.61 |
| <i>M. tonkeana</i>   | <i>M. mulatta</i>   | <i>M. thibetana</i>  | 151.60 | ~0.0 | 0.36 | 0.64 |
| <i>M. tonkeana</i>   | <i>M. mulatta</i>   | <i>M. assamensis</i> | 152.50 | ~0.0 | 0.37 | 0.63 |
| <i>M. nigra</i>      | <i>M. mulatta</i>   | <i>M. thibetana</i>  | 155.17 | ~0.0 | 0.36 | 0.64 |
| <i>M. nigra</i>      | <i>M. mulatta</i>   | <i>M. assamensis</i> | 156.36 | ~0.0 | 0.38 | 0.62 |
| <i>M. nemestrina</i> | <i>M. mulatta</i>   | <i>M. assamensis</i> | 157.06 | ~0.0 | 0.43 | 0.57 |
| <i>M. arctoides</i>  | <i>M. mulatta</i>   | <i>M. nemestrina</i> | 158.29 | ~0.0 | 0.70 | 0.30 |
| <i>M. nemestrina</i> | <i>M. mulatta</i>   | <i>M. thibetana</i>  | 159.43 | ~0.0 | 0.42 | 0.58 |
| <i>M. sylvanus</i>   | <i>M. thibetana</i> | <i>M. leonina</i>    | 69.38  | ~0.0 | 0.05 | 0.95 |
| <i>M. sylvanus</i>   | <i>M. thibetana</i> | <i>M. silenus</i>    | 72.02  | ~0.0 | 0.05 | 0.95 |

---

**Table S8. D-statistic results showing the combination of Z-score >3 as an indication of a possible signal of introgression between P2 and P3 assuming fig. S5A as the reference tree. *P. hamadryas* was used as the outgroup.**

| P1                   | P2                     | P3                     | Dstatistic | Z-score | p-value |
|----------------------|------------------------|------------------------|------------|---------|---------|
| <i>M. assamensis</i> | <i>M. fascicularis</i> | <i>M. nigra</i>        | 0.3739     | 15.4092 | ~0.0    |
| <i>M. assamensis</i> | <i>M. fascicularis</i> | <i>M. nemestrina</i>   | 0.3918     | 14.5011 | ~0.0    |
| <i>M. arctoides</i>  | <i>M. fascicularis</i> | <i>M. nemestrina</i>   | 0.3279     | 14.3206 | ~0.0    |
| <i>M. assamensis</i> | <i>M. fascicularis</i> | <i>M. leonina</i>      | 0.3694     | 12.9050 | ~0.0    |
| <i>M. assamensis</i> | <i>M. fascicularis</i> | <i>M. silenus</i>      | 0.3591     | 12.6795 | ~0.0    |
| <i>M. assamensis</i> | <i>M. fascicularis</i> | <i>M. tonkeana</i>     | 0.3408     | 12.6466 | ~0.0    |
| <i>M. thibetana</i>  | <i>M. fascicularis</i> | <i>M. nemestrina</i>   | 0.3823     | 11.7037 | ~0.0    |
| <i>M. arctoides</i>  | <i>M. fascicularis</i> | <i>M. silenus</i>      | 0.3095     | 10.8919 | ~0.0    |
| <i>M. thibetana</i>  | <i>M. fascicularis</i> | <i>M. nigra</i>        | 0.3361     | 10.5031 | ~0.0    |
| <i>M. arctoides</i>  | <i>M. fascicularis</i> | <i>M. nigra</i>        | 0.2797     | 10.1705 | ~0.0    |
| <i>M. thibetana</i>  | <i>M. fascicularis</i> | <i>M. leonina</i>      | 0.3473     | 10.1403 | ~0.0    |
| <i>M. thibetana</i>  | <i>M. fascicularis</i> | <i>M. silenus</i>      | 0.3390     | 9.4884  | ~0.0    |
| <i>M. arctoides</i>  | <i>M. fascicularis</i> | <i>M. leonina</i>      | 0.3002     | 9.3423  | ~0.0    |
| <i>M. assamensis</i> | <i>M. fuscata</i>      | <i>M. nigra</i>        | 0.3510     | 9.2571  | ~0.0    |
| <i>M. arctoides</i>  | <i>M. fascicularis</i> | <i>M. tonkeana</i>     | 0.2802     | 9.1394  | ~0.0    |
| <i>M. thibetana</i>  | <i>M. fascicularis</i> | <i>M. tonkeana</i>     | 0.3163     | 9.0768  | ~0.0    |
| <i>M. assamensis</i> | <i>M. fuscata</i>      | <i>M. nemestrina</i>   | 0.3459     | 8.2697  | ~0.0    |
| <i>M. assamensis</i> | <i>M. mulatta</i>      | <i>M. nemestrina</i>   | 0.3010     | 7.7672  | ~0.0    |
| <i>M. arctoides</i>  | <i>M. fuscata</i>      | <i>M. nemestrina</i>   | 0.2816     | 7.7213  | ~0.0    |
| <i>M. assamensis</i> | <i>M. mulatta</i>      | <i>M. nigra</i>        | 0.2708     | 7.6451  | ~0.0    |
| <i>M. assamensis</i> | <i>M. fuscata</i>      | <i>M. tonkeana</i>     | 0.3234     | 7.6256  | ~0.0    |
| <i>M. arctoides</i>  | <i>M. mulatta</i>      | <i>M. nemestrina</i>   | 0.2410     | 7.5331  | ~0.0    |
| <i>M. thibetana</i>  | <i>M. mulatta</i>      | <i>M. nemestrina</i>   | 0.2926     | 7.4817  | ~0.0    |
| <i>M. thibetana</i>  | <i>M. fuscata</i>      | <i>M. nemestrina</i>   | 0.3368     | 7.3266  | ~0.0    |
| <i>M. arctoides</i>  | <i>M. fuscata</i>      | <i>M. tonkeana</i>     | 0.2677     | 7.1757  | ~0.0    |
| <i>M. assamensis</i> | <i>M. fuscata</i>      | <i>M. leonina</i>      | 0.3276     | 7.0628  | ~0.0    |
| <i>M. assamensis</i> | <i>M. fuscata</i>      | <i>M. silenus</i>      | 0.3150     | 6.7004  | ~0.0    |
| <i>M. arctoides</i>  | <i>M. fuscata</i>      | <i>M. silenus</i>      | 0.2658     | 6.1848  | ~0.0    |
| <i>M. thibetana</i>  | <i>M. fuscata</i>      | <i>M. leonina</i>      | 0.2993     | 6.0794  | ~0.0    |
| <i>M. assamensis</i> | <i>M. arctoides</i>    | <i>M. fuscata</i>      | 0.2095     | 5.9479  | ~0.0    |
| <i>M. arctoides</i>  | <i>M. fuscata</i>      | <i>M. leonina</i>      | 0.2546     | 5.7599  | ~0.0    |
| <i>M. thibetana</i>  | <i>M. fuscata</i>      | <i>M. silenus</i>      | 0.2891     | 5.6943  | ~0.0    |
| <i>M. thibetana</i>  | <i>M. fuscata</i>      | <i>M. nigra</i>        | 0.3108     | 5.6345  | ~0.0    |
| <i>M. assamensis</i> | <i>M. mulatta</i>      | <i>M. tonkeana</i>     | 0.2501     | 5.5892  | ~0.0    |
| <i>M. thibetana</i>  | <i>M. fuscata</i>      | <i>M. tonkeana</i>     | 0.2997     | 5.5499  | ~0.0    |
| <i>M. assamensis</i> | <i>M. mulatta</i>      | <i>M. leonina</i>      | 0.2475     | 5.5134  | ~0.0    |
| <i>M. arctoides</i>  | <i>M. fuscata</i>      | <i>M. nigra</i>        | 0.2497     | 5.4793  | ~0.0    |
| <i>M. assamensis</i> | <i>M. mulatta</i>      | <i>M. silenus</i>      | 0.2422     | 5.2978  | ~0.0    |
| <i>M. arctoides</i>  | <i>M. mulatta</i>      | <i>M. silenus</i>      | 0.1943     | 5.1615  | ~0.0    |
| <i>M. assamensis</i> | <i>M. arctoides</i>    | <i>M. mulatta</i>      | 0.1965     | 5.0952  | ~0.0    |
| <i>M. thibetana</i>  | <i>M. mulatta</i>      | <i>M. nigra</i>        | 0.2315     | 4.9413  | ~0.0    |
| <i>M. arctoides</i>  | <i>M. mulatta</i>      | <i>M. tonkeana</i>     | 0.1940     | 4.9214  | ~0.0    |
| <i>M. assamensis</i> | <i>M. arctoides</i>    | <i>M. fascicularis</i> | 0.1822     | 4.8565  | ~0.0    |
| <i>M. thibetana</i>  | <i>M. mulatta</i>      | <i>M. silenus</i>      | 0.2218     | 4.7476  | ~0.0    |
| <i>M. thibetana</i>  | <i>M. mulatta</i>      | <i>M. leonina</i>      | 0.2253     | 4.6815  | ~0.0    |

|                      |                        |                        |        |        |        |
|----------------------|------------------------|------------------------|--------|--------|--------|
| <i>M. arctoides</i>  | <i>M. mulatta</i>      | <i>M. nigra</i>        | 0.1751 | 4.6477 | ~0.0   |
| <i>M. mulatta</i>    | <i>M. fascicularis</i> | <i>M. nigra</i>        | 0.1973 | 4.6210 | ~0.0   |
| <i>M. thibetana</i>  | <i>M. mulatta</i>      | <i>M. tonkeana</i>     | 0.2254 | 4.3947 | ~0.0   |
| <i>M. arctoides</i>  | <i>M. mulatta</i>      | <i>M. leonina</i>      | 0.1758 | 4.2984 | ~0.0   |
| <i>M. mulatta</i>    | <i>M. fascicularis</i> | <i>M. silenus</i>      | 0.2174 | 4.1549 | ~0.0   |
| <i>M. mulatta</i>    | <i>M. fascicularis</i> | <i>M. leonina</i>      | 0.2209 | 4.1322 | ~0.0   |
| <i>M. tonkeana</i>   | <i>M. nemestrina</i>   | <i>M. fascicularis</i> | 0.1854 | 4.1142 | ~0.0   |
| <i>M. fuscata</i>    | <i>M. mulatta</i>      | <i>M. fascicularis</i> | 0.1336 | 4.0828 | ~0.0   |
| <i>M. nigra</i>      | <i>M. silenus</i>      | <i>M. fascicularis</i> | 0.1798 | 3.8909 | ~0.0   |
| <i>M. nigra</i>      | <i>M. nemestrina</i>   | <i>M. mulatta</i>      | 0.1915 | 3.7307 | 0.0001 |
| <i>M. tonkeana</i>   | <i>M. silenus</i>      | <i>M. fascicularis</i> | 0.2105 | 3.6502 | 0.0001 |
| <i>M. nigra</i>      | <i>M. nemestrina</i>   | <i>M. fascicularis</i> | 0.1542 | 3.5679 | 0.0002 |
| <i>M. thibetana</i>  | <i>M. arctoides</i>    | <i>M. fuscata</i>      | 0.1673 | 3.5294 | 0.0002 |
| <i>M. mulatta</i>    | <i>M. fascicularis</i> | <i>M. nemestrina</i>   | 0.1548 | 3.4904 | 0.0002 |
| <i>M. leonina</i>    | <i>M. silenus</i>      | <i>M. assamensis</i>   | 0.2291 | 3.3970 | 0.0003 |
| <i>M. nigra</i>      | <i>M. nemestrina</i>   | <i>M. fuscata</i>      | 0.1464 | 3.3917 | 0.0003 |
| <i>M. thibetana</i>  | <i>M. arctoides</i>    | <i>M. fascicularis</i> | 0.1330 | 3.3062 | 0.0005 |
| <i>M. mulatta</i>    | <i>M. fuscata</i>      | <i>M. leonina</i>      | 0.1571 | 3.2693 | 0.0005 |
| <i>M. nigra</i>      | <i>M. silenus</i>      | <i>M. assamensis</i>   | 0.1787 | 3.1959 | 0.0007 |
| <i>M. mulatta</i>    | <i>M. assamensis</i>   | <i>M. sylvanus</i>     | 0.1126 | 3.1323 | 0.0009 |
| <i>M. nemestrina</i> | <i>M. silenus</i>      | <i>M. tonkeana</i>     | 0.0768 | 3.1270 | 0.0009 |
| <i>M. nigra</i>      | <i>M. leonina</i>      | <i>M. fascicularis</i> | 0.1286 | 3.0884 | 0.0010 |
| <i>M. assamensis</i> | <i>M. arctoides</i>    | <i>M. nigra</i>        | 0.1767 | 3.0818 | 0.0010 |
| <i>M. assamensis</i> | <i>M. thibetana</i>    | <i>M. arctoides</i>    | 0.0725 | 3.0230 | 0.0013 |

**Table S9. D-statistic results showing the combination of Z-score >3 as an indication of a possible signal of introgression between P2 and P3 assuming fig. S5B as the reference tree. *P. hamadryas* was used as the outgroup.**

| P1                   | P2                     | P3                   | Dstatistic | Z-score | p-value |
|----------------------|------------------------|----------------------|------------|---------|---------|
| <i>M. assamensis</i> | <i>M. fascicularis</i> | <i>M. silenus</i>    | 0.3185     | 11.0505 | ~0.0    |
| <i>M. thibetana</i>  | <i>M. fascicularis</i> | <i>M. nemestrina</i> | 0.3173     | 10.9595 | ~0.0    |
| <i>M. assamensis</i> | <i>M. fascicularis</i> | <i>M. nigra</i>      | 0.2481     | 10.7635 | ~0.0    |
| <i>M. thibetana</i>  | <i>M. fascicularis</i> | <i>M. leonina</i>    | 0.3237     | 10.5930 | ~0.0    |
| <i>M. assamensis</i> | <i>M. fascicularis</i> | <i>M. leonina</i>    | 0.3065     | 10.5099 | ~0.0    |
| <i>M. arctoides</i>  | <i>M. fascicularis</i> | <i>M. nemestrina</i> | 0.3188     | 10.4124 | ~0.0    |
| <i>M. assamensis</i> | <i>M. fascicularis</i> | <i>M. nemestrina</i> | 0.3054     | 10.2569 | ~0.0    |
| <i>M. thibetana</i>  | <i>M. fascicularis</i> | <i>M. nigra</i>      | 0.2613     | 10.1511 | ~0.0    |
| <i>M. thibetana</i>  | <i>M. fascicularis</i> | <i>M. tonkeana</i>   | 0.2549     | 10.0383 | ~0.0    |
| <i>M. thibetana</i>  | <i>M. fascicularis</i> | <i>M. silenus</i>    | 0.3336     | 9.7071  | ~0.0    |
| <i>M. assamensis</i> | <i>M. fascicularis</i> | <i>M. tonkeana</i>   | 0.2507     | 8.9743  | ~0.0    |
| <i>M. thibetana</i>  | <i>M. fuscata</i>      | <i>M. leonina</i>    | 0.2449     | 8.9695  | ~0.0    |
| <i>M. assamensis</i> | <i>M. fuscata</i>      | <i>M. leonina</i>    | 0.2229     | 8.4416  | ~0.0    |
| <i>M. assamensis</i> | <i>M. fuscata</i>      | <i>M. silenus</i>    | 0.2426     | 8.3239  | ~0.0    |
| <i>M. thibetana</i>  | <i>M. fuscata</i>      | <i>M. silenus</i>    | 0.2592     | 8.1415  | ~0.0    |
| <i>M. thibetana</i>  | <i>M. fuscata</i>      | <i>M. nemestrina</i> | 0.2372     | 7.7463  | ~0.0    |
| <i>M. arctoides</i>  | <i>M. fascicularis</i> | <i>M. leonina</i>    | 0.3102     | 7.7277  | ~0.0    |
| <i>M. arctoides</i>  | <i>M. fascicularis</i> | <i>M. silenus</i>    | 0.3053     | 7.6233  | ~0.0    |
| <i>M. arctoides</i>  | <i>M. fascicularis</i> | <i>M. nigra</i>      | 0.2581     | 7.5484  | ~0.0    |
| <i>M. arctoides</i>  | <i>M. fascicularis</i> | <i>M. tonkeana</i>   | 0.2636     | 7.5263  | ~0.0    |
| <i>M. assamensis</i> | <i>M. fuscata</i>      | <i>M. nemestrina</i> | 0.2225     | 7.3796  | ~0.0    |
| <i>M. thibetana</i>  | <i>M. mulatta</i>      | <i>M. nemestrina</i> | 0.2389     | 7.2829  | ~0.0    |
| <i>M. arctoides</i>  | <i>M. mulatta</i>      | <i>M. nemestrina</i> | 0.2430     | 7.2656  | ~0.0    |
| <i>M. assamensis</i> | <i>M. mulatta</i>      | <i>M. silenus</i>    | 0.2178     | 7.0392  | ~0.0    |
| <i>M. thibetana</i>  | <i>M. mulatta</i>      | <i>M. silenus</i>    | 0.2316     | 6.8688  | ~0.0    |
| <i>M. thibetana</i>  | <i>M. mulatta</i>      | <i>M. leonina</i>    | 0.2132     | 6.8588  | ~0.0    |
| <i>M. assamensis</i> | <i>M. mulatta</i>      | <i>M. nemestrina</i> | 0.2259     | 6.8335  | ~0.0    |
| <i>M. arctoides</i>  | <i>M. fuscata</i>      | <i>M. nemestrina</i> | 0.2382     | 6.7963  | ~0.0    |
| <i>M. assamensis</i> | <i>M. mulatta</i>      | <i>M. leonina</i>    | 0.1950     | 6.7638  | ~0.0    |
| <i>M. thibetana</i>  | <i>M. mulatta</i>      | <i>M. nigra</i>      | 0.1777     | 6.6106  | ~0.0    |
| <i>M. arctoides</i>  | <i>M. mulatta</i>      | <i>M. silenus</i>    | 0.2134     | 6.5214  | ~0.0    |
| <i>M. thibetana</i>  | <i>M. fuscata</i>      | <i>M. nigra</i>      | 0.2069     | 6.3694  | ~0.0    |
| <i>M. thibetana</i>  | <i>M. fuscata</i>      | <i>M. tonkeana</i>   | 0.2075     | 6.3327  | ~0.0    |
| <i>M. arctoides</i>  | <i>M. fuscata</i>      | <i>M. leonina</i>    | 0.2319     | 6.2162  | ~0.0    |
| <i>M. arctoides</i>  | <i>M. fuscata</i>      | <i>M. silenus</i>    | 0.2329     | 6.1236  | ~0.0    |
| <i>M. assamensis</i> | <i>M. fuscata</i>      | <i>M. nigra</i>      | 0.1912     | 6.0300  | ~0.0    |
| <i>M. arctoides</i>  | <i>M. mulatta</i>      | <i>M. leonina</i>    | 0.2055     | 5.9915  | ~0.0    |
| <i>M. assamensis</i> | <i>M. mulatta</i>      | <i>M. nigra</i>      | 0.1651     | 5.9464  | ~0.0    |
| <i>M. assamensis</i> | <i>M. fuscata</i>      | <i>M. tonkeana</i>   | 0.2014     | 5.8718  | ~0.0    |
| <i>M. thibetana</i>  | <i>M. mulatta</i>      | <i>M. tonkeana</i>   | 0.1821     | 5.8375  | ~0.0    |
| <i>M. assamensis</i> | <i>M. mulatta</i>      | <i>M. tonkeana</i>   | 0.1767     | 5.3759  | ~0.0    |
| <i>M. assamensis</i> | <i>M. arctoides</i>    | <i>M. mulatta</i>    | 0.1569     | 5.2906  | ~0.0    |
| <i>M. arctoides</i>  | <i>M. fuscata</i>      | <i>M. nigra</i>      | 0.2040     | 5.1788  | ~0.0    |
| <i>M. arctoides</i>  | <i>M. fuscata</i>      | <i>M. tonkeana</i>   | 0.2174     | 5.0406  | ~0.0    |
| <i>M. arctoides</i>  | <i>M. mulatta</i>      | <i>M. tonkeana</i>   | 0.1930     | 5.0222  | ~0.0    |

|                      |                        |                        |        |        |        |
|----------------------|------------------------|------------------------|--------|--------|--------|
| <i>M. arctoides</i>  | <i>M. mulatta</i>      | <i>M. nigra</i>        | 0.1781 | 4.9600 | ~0.0   |
| <i>M. assamensis</i> | <i>M. arctoides</i>    | <i>M. fuscata</i>      | 0.1380 | 4.8609 | ~0.0   |
| <i>M. nigra</i>      | <i>M. leonina</i>      | <i>M. fascicularis</i> | 0.2074 | 4.1347 | ~0.0   |
| <i>M. tonkeana</i>   | <i>M. nemestrina</i>   | <i>M. fascicularis</i> | 0.2084 | 4.0973 | ~0.0   |
| <i>M. fuscata</i>    | <i>M. fascicularis</i> | <i>M. nemestrina</i>   | 0.1313 | 4.0774 | ~0.0   |
| <i>M. nigra</i>      | <i>M. nemestrina</i>   | <i>M. fascicularis</i> | 0.2113 | 3.9581 | ~0.0   |
| <i>M. tonkeana</i>   | <i>M. nemestrina</i>   | <i>M. mulatta</i>      | 0.1867 | 3.7155 | 0.0001 |
| <i>M. assamensis</i> | <i>M. arctoides</i>    | <i>M. fascicularis</i> | 0.0964 | 3.6852 | 0.0001 |
| <i>M. tonkeana</i>   | <i>M. leonina</i>      | <i>M. fascicularis</i> | 0.1998 | 3.6707 | 0.0001 |
| <i>M. nigra</i>      | <i>M. silenus</i>      | <i>M. fascicularis</i> | 0.1943 | 3.6254 | 0.0001 |
| <i>M. mulatta</i>    | <i>M. fascicularis</i> | <i>M. leonina</i>      | 0.1748 | 3.6000 | 0.0002 |
| <i>M. nigra</i>      | <i>M. nemestrina</i>   | <i>M. mulatta</i>      | 0.2037 | 3.5420 | 0.0002 |
| <i>M. mulatta</i>    | <i>M. arctoides</i>    | <i>M. sylvanus</i>     | 0.1494 | 3.5010 | 0.0002 |
| <i>M. thibetana</i>  | <i>M. arctoides</i>    | <i>M. mulatta</i>      | 0.1324 | 3.4363 | 0.0003 |
| <i>M. nemestrina</i> | <i>M. leonina</i>      | <i>M. nigra</i>        | 0.0913 | 3.4208 | 0.0003 |
| <i>M. mulatta</i>    | <i>M. fascicularis</i> | <i>M. nigra</i>        | 0.1290 | 3.2752 | 0.0005 |
| <i>M. mulatta</i>    | <i>M. assamensis</i>   | <i>M. sylvanus</i>     | 0.1396 | 3.2480 | 0.0006 |
| <i>M. nemestrina</i> | <i>M. leonina</i>      | <i>M. tonkeana</i>     | 0.0842 | 3.2249 | 0.0006 |
| <i>M. fuscata</i>    | <i>M. fascicularis</i> | <i>M. leonina</i>      | 0.1288 | 3.1908 | 0.0007 |
| <i>M. mulatta</i>    | <i>M. thibetana</i>    | <i>M. sylvanus</i>     | 0.1417 | 3.1517 | 0.0008 |
| <i>M. mulatta</i>    | <i>M. fascicularis</i> | <i>M. silenus</i>      | 0.1536 | 3.0738 | 0.0011 |
| <i>M. tonkeana</i>   | <i>M. silenus</i>      | <i>M. fascicularis</i> | 0.1907 | 3.0722 | 0.0011 |
| <i>M. nigra</i>      | <i>M. silenus</i>      | <i>M. mulatta</i>      | 0.1489 | 3.0621 | 0.0011 |

**Table S10. Z-score values between pairs of species groups inferred from the Dsuit package assuming fig. S5A as the reference tree.** Cells with Z-score values >3 are given in bold. sin: *sinica* group; sil: *silenus* group; fas: *fascicularis* group; syl: *sylvanus* group.

| <b>branch_descendants</b> | <b>Sin</b> | <b>fas</b> | <b>sil</b>   | <b>syl</b>  |
|---------------------------|------------|------------|--------------|-------------|
| sil,sin,fas               | Nan        | nan        | nan          | nan         |
| sin,fas                   | Nan        | nan        | nan          | 0.00        |
| sin                       | Nan        | nan        | 0.00         | <b>3.08</b> |
| fas                       | Nan        | nan        | <b>10.95</b> | 0.00        |
| sil                       | Nan        | nan        | nan          | 0.65        |
| syl                       | Nan        | nan        | nan          | nan         |



**Table S11. Z-score values between pairs of species groups inferred from the Dsuit package assuming fig. S5B as the reference tree.** The cell with a Z-score value >3 is given in bold. sin: *sinica* group; sil: *silenus* group; fas: *fascicularis* group; syl: *sylvanus* group.

| <b>branch_descendants</b> | <b>sin</b>   | <b>fas</b> | <b>sil</b> | <b>syl</b> |
|---------------------------|--------------|------------|------------|------------|
| sin,fas,sil               | nan          | nan        | nan        | nan        |
| sin                       | nan          | nan        | nan        | 2.78       |
| fas,sil                   | nan          | nan        | nan        | 0.00       |
| fas                       | <b>20.64</b> | nan        | nan        | 0.00       |
| sil                       | 0.00         | nan        | nan        | 1.31       |
| syl                       | nan          | nan        | nan        | nan        |

**Table S12. Z-score values between pairs of species inferred from the Dsuit package assuming fig. S5A as the reference tree. Cells with Z-score values >3 are given in bold. Species are abbreviated using the first letter of the genus name and the first three letters of the species name.**

| <b>branch_descendants</b>                              | <b>Msyl</b> | <b>Mfas</b> | <b>Mfus</b> | <b>Mmul</b> | <b>Marc</b> | <b>Mthi</b> | <b>Mass</b> | <b>Mnem</b> | <b>Mleo</b> | <b>Msil</b> | <b>Mnig</b> | <b>Mton</b> |
|--------------------------------------------------------|-------------|-------------|-------------|-------------|-------------|-------------|-------------|-------------|-------------|-------------|-------------|-------------|
| Msyl                                                   | nan         |
| Mfas,Mmul,Mfus,Marc,Mthi,Mass,Mnig,Mton,Mnem,Msil,Mleo | nan         |
| Mfas,Mmul,Mfus,Marc,Mthi,Mass                          | 0.00        | nan         |
| Mfas,Mmul,Mfus                                         | 0.00        | nan         | nan         | nan         | nan         | nan         | nan         | <b>7.53</b> | <b>4.68</b> | <b>5.16</b> | <b>4.94</b> | <b>4.92</b> |
| Mfas                                                   | 1.23        | nan         | nan         | nan         | 0.15        | 0.43        | 0.65        | 3.00        | 3.00        | 2.99        | 3.01        | 1.86        |
| Mmul,Mfus                                              | 0.00        | nan         | nan         | nan         | 0.00        | 0.00        | 0.00        | 0.00        | 0.00        | 0.00        | 0.00        | 0.00        |
| Mmul                                                   | 0.00        | <b>4.08</b> | nan         | nan         | 0.00        | 0.00        | 0.00        | 0.00        | 0.00        | 0.00        | 0.00        | 0.00        |
| Mfus                                                   | 2.67        | 0.00        | nan         | nan         | 1.66        | 1.11        | 1.66        | 1.38        | <b>3.27</b> | 2.47        | 2.32        | 2.29        |
| Marc,Mthi,Mass                                         | 1.02        | nan         | nan         | nan         | nan         | nan         | nan         | 0.00        | 0.00        | 0.00        | 0.00        | 0.00        |
| Marc                                                   | 0.00        | <b>4.08</b> | <b>4.74</b> | <b>4.03</b> | nan         | nan         | nan         | 1.85        | 1.67        | 1.22        | 2.34        | 1.36        |
| Mthi,Mass                                              | 0.17        | 0.00        | 0.00        | 0.00        | nan         | nan         | nan         | 0.00        | 0.00        | 0.00        | 0.00        | 0.00        |
| Mthi                                                   | 0.00        | 1.70        | 1.55        | 2.13        | <b>3.02</b> | nan         | nan         | 0.34        | 0.88        | 0.67        | 1.27        | 0.93        |
| Mass                                                   | 0.24        | 0.00        | 0.00        | 0.00        | 0.00        | nan         | nan         | 0.00        | 0.00        | 0.00        | 0.00        | 0.00        |
| Mnig,Mton,Mnem,Msil,Mleo                               | 0.00        | nan         |
| Mnem,Msil,Mleo                                         | 0.00        | <b>3.01</b> | 2.21        | 1.44        | 0.70        | 0.39        | 0.91        | nan         | nan         | nan         | nan         | nan         |
| Mnem                                                   | 0.20        | 0.40        | 0.41        | 1.30        | 0.00        | 0.00        | 0.05        | nan         | nan         | nan         | 0.00        | 0.00        |
| Msil                                                   | 1.10        | 1.91        | 1.42        | 1.98        | 1.52        | 2.62        | <b>3.40</b> | 1.92        | nan         | nan         | 1.13        | 1.18        |
| Mleo                                                   | 0.00        | 0.00        | 0.00        | 0.00        | 0.00        | 0.00        | 0.00        | 0.00        | nan         | nan         | 0.00        | 0.00        |
| Msil,Mleo                                              | 0.00        | 0.00        | 0.00        | 0.00        | 0.12        | 0.50        | 0.00        | nan         | nan         | nan         | 0.66        | 1.46        |
| Mnig,Mton                                              | 0.35        | 0.00        | 0.00        | 0.00        | 0.00        | 0.00        | 0.00        | nan         | nan         | nan         | nan         | nan         |
| Mnig                                                   | 0.47        | 0.81        | 0.00        | 0.00        | 0.49        | 0.00        | 0.00        | 0.00        | 0.00        | 0.00        | nan         | nan         |
| Mton                                                   | 0.00        | 0.00        | 1.18        | 1.63        | 0.00        | 0.49        | 0.80        | 0.41        | 1.07        | 1.32        | nan         | nan         |

**Table S13. Z-score values between pairs of species inferred from the Dsuit package assuming fig. S5B as the reference tree. Cells with Z-scores values >3 are given in bold. Species are abbreviated using the first letter of the genus name and the first three letters of the species name.**

| <b>branch_descendants</b>                              | <b>Msyl</b> | <b>Mnem</b> | <b>Mleo</b> | <b>Msil</b> | <b>Mnig</b> | <b>Mton</b> | <b>Mfas</b> | <b>Mfus</b> | <b>Mmul</b> | <b>Marc</b>  | <b>Mthi</b>  | <b>Mass</b>  |
|--------------------------------------------------------|-------------|-------------|-------------|-------------|-------------|-------------|-------------|-------------|-------------|--------------|--------------|--------------|
| Msyl                                                   | nan          | nan          | nan          |
| Marc,Mthi,Mass,Mfas,Mfus,Mmul,Mnig,Mton,Mnem,Mleo,Msil | nan          | nan          | nan          |
| Mfas,Mfus,Mmul,Mnig,Mton,Mnem,Mleo,Msil                | 0.00        | nan          | nan          | nan          |
| Mnig,Mton,Mnem,Mleo,Msil                               | 0.43        | nan         | 0.00         | 0.00         | 0.00         |
| Mnem,Mleo,Msil                                         | 0.18        | nan         | nan         | nan         | nan         | nan         | <b>3.35</b> | 2.40        | 2.66        | 0.97         | 0.36         | 0.49         |
| Mnem                                                   | 0.00        | nan         | nan         | nan         | 0.00        | 0.00        | 0.34        | 0.06        | 1.60        | 0.00         | 0.61         | 0.38         |
| Mleo,Msil                                              | 0.18        | nan         | nan         | nan         | 2.27        | 1.18        | 0.00        | 0.00        | 0.00        | 0.08         | 0.00         | 0.00         |
| Mleo                                                   | 0.00        | 0.78        | nan         | nan         | 1.18        | 2.59        | 0.21        | 0.00        | 0.00        | 0.00         | 0.63         | 0.83         |
| Msil                                                   | 1.28        | 0.00        | nan         | nan         | 0.00        | 0.00        | 0.00        | 0.33        | 0.58        | 0.00         | 0.00         | 0.00         |
| Mnig,Mton                                              | 0.00        | nan         | nan         | nan         | nan         | nan         | 0.00        | 0.00        | 0.00        | 0.00         | 0.00         | 0.00         |
| Mnig                                                   | 0.44        | 0.42        | 0.58        | 1.24        | nan         | nan         | 0.06        | 0.00        | 0.00        | 0.31         | 0.00         | 0.17         |
| Mton                                                   | 0.00        | 0.00        | 0.00        | 0.00        | nan         | nan         | 0.00        | 0.42        | 0.53        | 0.00         | 0.25         | 0.00         |
| Mfas,Mfus,Mmul                                         | 0.00        | nan         | <b>13.08</b> | <b>12.39</b> | <b>11.14</b> |
| Mfas                                                   | 0.64        | <b>3.49</b> | <b>3.40</b> | 2.85        | 2.75        | 2.22        | nan         | nan         | nan         | 0.24         | 1.29         | 1.95         |
| Mfus,Mmul                                              | 0.00        | 0.00        | 0.00        | 0.00        | 0.00        | 0.00        | nan         | nan         | nan         | 0.00         | 0.00         | 0.00         |
| Mfus                                                   | 0.45        | 0.00        | 1.13        | 0.73        | 1.06        | 0.98        | 0.00        | nan         | nan         | 1.02         | 2.02         | 1.85         |
| Mmul                                                   | 0.00        | 0.46        | 0.00        | 0.00        | 0.00        | 0.00        | 2.67        | nan         | nan         | 0.00         | 0.00         | 0.00         |
| Marc,Mthi,Mass                                         | 2.20        | nan          | nan          | nan          |
| Marc                                                   | 0.15        | 0.06        | 0.23        | 0.50        | 0.10        | 0.00        | <b>3.06</b> | <b>3.86</b> | <b>4.36</b> | nan          | nan          | nan          |
| Mthi,Mass                                              | 0.00        | 0.00        | 0.00        | 0.00        | 0.00        | 0.16        | 0.00        | 0.00        | 0.00        | nan          | nan          | nan          |
| Mthi                                                   | 0.08        | 0.00        | 0.00        | 0.00        | 0.00        | 0.00        | 0.34        | 0.84        | 0.81        | 0.45         | nan          | nan          |
| Mass                                                   | 0.00        | 0.79        | 0.79        | 0.64        | 0.65        | 0.33        | 0.00        | 0.00        | 0.00        | 0.00         | nan          | nan          |

**Table S14. PSGs identified in the comparison *fascicularis-sinica* versus *silenus* groups with *P*-value <0.01(after Yates' correction), a top 2.5% number of fixed non-synonymous mutations and fixed 1 kb upstream differences.** The phylogenetic analysis supported the sister relationship between the *fascicularis* and *sinica* groups. Genes were sorted by the sum of the fixed number of non-synonymous mutations (FixNonSyn) and fixed 1-kb upstream mutations (Fix1kup).

| Chromosome | Num<br>FixNonSyn+Fix1kup | Num<br>FixNonSyn | Num<br>Fix1kup | P-value  | Gene Symbol     | Full Name                                               |
|------------|--------------------------|------------------|----------------|----------|-----------------|---------------------------------------------------------|
| Chr9       | 10                       | 0                | 10             | 2.20E-16 | <i>MKX</i>      | Homeobox protein Mohawk                                 |
| Chr11      | 9                        | 3                | 6              | 2.20E-16 | <i>TAS2R64</i>  | Taste receptor type 2 member 64                         |
| ChrY       | 8                        | 4                | 4              | 2.20E-16 | <i>MXRA5</i>    | Matrix-remodeling-associated protein 5                  |
| Chr13      | 8                        | 6                | 2              | 2.20E-16 | <i>ASPRV1</i>   | Retroviral-like aspartic protease 1                     |
| Chr3       | 8                        | 6                | 2              | 1.53E-14 | <i>NACAD</i>    | NAC-alpha domain-containing protein 1                   |
| Chr2       | 7                        | 0                | 7              | 1.13E-11 | <i>WDR48</i>    | WD repeat-containing protein 48                         |
| Chr16      | 7                        | 1                | 6              | 5.21E-13 | <i>OR4D2</i>    | Olfactory receptor 4D2                                  |
| Chr15      | 7                        | 1                | 6              | 1.26E-12 | <i>KDM4C</i>    | Lysine-specific demethylase 4C                          |
| Chr8       | 7                        | 4                | 3              | 2.20E-16 | <i>MTUS1</i>    | Microtubule-associated tumor suppressor 1 homolog       |
| Chr12      | 7                        | 6                | 1              | 3.82E-11 | <i>ZDBF2</i>    | DBF4-type zinc finger-containing protein 2              |
| Chr14      | 7                        | 6                | 1              | 0.000431 | <i>PHRF1</i>    | PHD and RING finger domain-containing protein 1         |
| Chr12      | 7                        | 7                | 0              | 3.42E-08 | <i>TTN</i>      | Titin                                                   |
| Chr12      | 7                        | 7                | 0              | 0.003575 | <i>FSIP2</i>    | Fibrous sheath-interacting protein 2                    |
| Chr10      | 6                        | 0                | 6              | 2.40E-10 | <i>GPCPD1</i>   | Glycerophosphocholine phosphodiesterase GPCPD1          |
| Chr1       | 6                        | 0                | 6              | 2.01E-08 | <i>ANKRD65</i>  | Ankyrin repeat domain-containing protein 65             |
| Chr14      | 6                        | 1                | 5              | 9.94E-14 | <i>KIF18A</i>   | Kinesin-like protein KIF18A                             |
| Chr7       | 6                        | 1                | 5              | 3.34E-12 | <i>MLH3</i>     | DNA mismatch repair protein Mlh3                        |
| Chr11      | 6                        | 2                | 4              | 2.20E-16 | <i>IFT81</i>    | Intraflagellar transport protein 81 homolog             |
| Chr12      | 6                        | 2                | 4              | 6.61E-15 | <i>TRAF3IP1</i> | TRAF3-interacting protein 1                             |
| Chr14      | 6                        | 2                | 4              | 1.26E-12 | <i>LYVE1</i>    | Lymphatic vessel endothelial hyaluronic acid receptor 1 |
| Chr12      | 6                        | 3                | 3              | 2.20E-16 | <i>WIPF1</i>    | WAS/WASL-interacting protein family member 1            |
| Chr1       | 6                        | 3                | 3              | 1.06E-15 | <i>DNAJB6</i>   | DnaJ homolog subfamily B member 6                       |
| Chr10      | 6                        | 3                | 3              | 2.64E-11 | <i>SUSD2</i>    | Sushi domain-containing protein 2                       |

|       |   |   |   |          |                     |                                                                  |
|-------|---|---|---|----------|---------------------|------------------------------------------------------------------|
| Chr16 | 6 | 5 | 1 | 7.42E-14 | <i>KIF2B</i>        | Kinesin-like protein KIF2B                                       |
| Chr7  | 6 | 5 | 1 | 1.58E-07 | <i>KNL1</i>         | Kinetochore scaffold 1                                           |
| Chr12 | 5 | 0 | 5 | 4.65E-14 | <i>PGAP1</i>        | GPI inositol-deacylase                                           |
| Chr6  | 5 | 0 | 5 | 1.50E-11 | <i>PLPP1</i>        | Phospholipid phosphatase 1                                       |
| Chr4  | 5 | 0 | 5 | 7.87E-11 | <i>EGFL8</i>        | Epidermal growth factor-like protein 8                           |
| Chr6  | 5 | 0 | 5 | 1.49E-09 | <i>RAB24</i>        | Ras-related protein Rab-24                                       |
| Chr14 | 5 | 0 | 5 | 3.99E-08 | <i>TMEM126B</i>     | Complex I assembly factor TMEM126B, mitochondrial                |
| Chr4  | 5 | 0 | 5 | 9.78E-08 | <i>TGas006m08.1</i> | Histone H4                                                       |
| Chr9  | 5 | 0 | 5 | 9.78E-08 | <i>MORN4</i>        | MORN repeat-containing protein 4                                 |
| Chr12 | 5 | 0 | 5 | 9.78E-08 | <i>GPR35</i>        | G-protein coupled receptor 35                                    |
| Chr19 | 5 | 1 | 4 | 1.49E-09 | <i>DMRTC2</i>       | Doublesex- and mab-3-related transcription factor C2             |
| Chr14 | 5 | 1 | 4 | 1.49E-09 | <i>BTG4</i>         | Protein BTG4                                                     |
| Chr19 | 5 | 1 | 4 | 3.99E-08 | <i>MUM1</i>         | PWWP domain-containing protein MUM1                              |
| Chr4  | 5 | 1 | 4 | 2.64E-07 | <i>PRDM13</i>       | PR domain zinc finger protein 13                                 |
| Chr8  | 5 | 1 | 4 | 5.24E-06 | <i>TRPA1</i>        | Transient receptor potential cation channel subfamily A member 1 |
| Chr7  | 5 | 2 | 3 | 7.87E-11 | <i>NGDN</i>         | Neuroguidin                                                      |
| Chr8  | 5 | 2 | 3 | 8.40E-11 | <i>LRRC24</i>       | Leucine-rich repeat-containing protein 24                        |
| Chr6  | 5 | 2 | 3 | 1.49E-09 | <i>APBB3</i>        | Amyloid beta A4 precursor protein-binding family B member 3      |
| Chr19 | 5 | 2 | 3 | 4.99E-09 | <i>ZNF256</i>       | Zinc finger protein 256                                          |
| Chr7  | 5 | 2 | 3 | 1.44E-05 | <i>Ino80</i>        | DNA helicase INO80                                               |
| Chr15 | 5 | 3 | 2 | 3.80E-08 | <i>DENND1A</i>      | DENN domain-containing protein 1A                                |
| ChrX  | 5 | 3 | 2 | 0.000189 | <i>ARMCX4</i>       | Armadillo repeat-containing X-linked protein 4                   |
| Chr10 | 5 | 3 | 2 | 0.002678 | <i>ZSWIM3</i>       | Zinc finger SWIM domain-containing protein 3                     |
| Chr16 | 5 | 4 | 1 | 6.83E-16 | <i>GEMIN4</i>       | Gem-associated protein 4                                         |
| Chr10 | 5 | 4 | 1 | 0.002248 | <i>TRIOBP</i>       | TRIO and F-actin-binding protein                                 |
| Chr3  | 4 | 0 | 4 | 2.20E-16 | <i>ZYX</i>          | Zyxin                                                            |
| Chr12 | 4 | 0 | 4 | 2.81E-13 | <i>DYNC1I2</i>      | Cytoplasmic dynein 1 intermediate chain 2                        |
| Chr12 | 4 | 0 | 4 | 1.42E-12 | <i>AGPS</i>         | Alkyldihydroxyacetonephosphate synthase, peroxisomal             |

|       |   |   |   |          |                  |                                                             |
|-------|---|---|---|----------|------------------|-------------------------------------------------------------|
| ChrX  | 4 | 0 | 4 | 4.84E-09 | <i>MAGT1</i>     | Magnesium transporter protein 1                             |
| Chr8  | 4 | 0 | 4 | 9.78E-08 | <i>CA8</i>       | Carbonic anhydrase-related protein                          |
| Chr7  | 4 | 0 | 4 | 2.22E-07 | <i>FLVCR2</i>    | Feline leukemia virus subgroup C receptor-related protein 2 |
| Chr5  | 4 | 0 | 4 | 3.23E-07 | <i>HNRNPD</i>    | Heterogeneous nuclear ribonucleoprotein D0                  |
| Chr8  | 4 | 0 | 4 | 9.40E-07 | <i>Naca</i>      | Nascent polypeptide-associated complex subunit alpha        |
| Chr2  | 4 | 0 | 4 | 1.25E-06 | <i>ZNF620</i>    | Zinc finger protein 620                                     |
| Chr16 | 4 | 0 | 4 | 1.78E-06 | <i>PIGS</i>      | GPI transamidase component PIG-S                            |
| Chr1  | 4 | 0 | 4 | 5.36E-06 | <i>SLC30A10</i>  | Zinc transporter 10                                         |
| Chr19 | 4 | 0 | 4 | 1.13E-05 | <i>SAE1</i>      | SUMO-activating enzyme subunit 1                            |
| Chr4  | 4 | 0 | 4 | 5.28E-05 | <i>HIST1H2AJ</i> | Histone H2A type 1-J                                        |
| Chr18 | 4 | 0 | 4 | 0.000115 | <i>Kctd1</i>     | BTB/POZ domain-containing protein KCTD1                     |
| Chr6  | 4 | 0 | 4 | 0.000115 | <i>SKIV2L2</i>   | Superkiller viralicidic activity 2-like 2                   |
| Chr10 | 4 | 0 | 4 | 0.000182 | <i>C20orf204</i> | Chromosome 20 open reading frame 204                        |
| Chr3  | 4 | 0 | 4 | 0.000412 | <i>EIF3B</i>     | Eukaryotic translation initiation factor 3 subunit B        |
| Chr7  | 4 | 0 | 4 | 0.000412 | <i>CRIP1</i>     | Cysteine-rich protein 1                                     |
| Chr1  | 4 | 0 | 4 | 0.000477 | <i>ECE1</i>      | Endothelin-converting enzyme 1                              |
| Chr4  | 4 | 0 | 4 | 0.00083  | <i>OSTM1</i>     | Osteopetrosis-associated transmembrane protein 1            |
| Chr2  | 4 | 0 | 4 | 0.001136 | <i>CRBN</i>      | Protein cereblon                                            |
| Chr1  | 4 | 0 | 4 | 0.001522 | <i>PFKFB2</i>    | 6-phosphofructo-2-kinase/fructose-2,6-bisphosphatase 2      |
| Chr7  | 4 | 1 | 3 | 2.81E-13 | <i>ZC2HC1C</i>   | Zinc finger C2HC domain-containing protein 1C               |
| ChrY  | 4 | 1 | 3 | 1.42E-12 | <i>USP9Y</i>     | Probable ubiquitin carboxyl-terminal hydrolase FAF-Y        |
| Chr5  | 4 | 1 | 3 | 4.16E-09 | <i>Cpeb2</i>     | Cytoplasmic polyadenylation element-binding protein 2       |
| Chr11 | 4 | 1 | 3 | 4.84E-09 | <i>VPS29</i>     | Vacuolar protein sorting-associated protein 29              |
| Chr3  | 4 | 1 | 3 | 4.08E-08 | <i>PVRIG</i>     | Transmembrane protein PVRIG                                 |
| Chr8  | 4 | 1 | 3 | 3.22E-06 | <i>CEBPD</i>     | CCAAT/enhancer-binding protein delta                        |
| Chr5  | 4 | 1 | 3 | 5.36E-06 | <i>PEF1</i>      | Peflin                                                      |
| Chr13 | 4 | 1 | 3 | 5.57E-06 | <i>TGOLN2</i>    | Trans-Golgi network integral membrane protein 2             |
| Chr2  | 4 | 1 | 3 | 4.01E-05 | <i>POCIA</i>     | POC1 centriolar protein homolog A                           |

|       |   |   |   |          |                 |                                                                |
|-------|---|---|---|----------|-----------------|----------------------------------------------------------------|
| Chr2  | 4 | 1 | 3 | 0.000108 | <i>EIF4B</i>    | Eukaryotic translation initiation factor 4B                    |
| Chr2  | 4 | 1 | 3 | 0.000115 | <i>LRR1Q4</i>   | Leucine-rich repeat and IQ domain-containing protein 4         |
| Chr4  | 4 | 1 | 3 | 0.000115 | <i>TJAP1</i>    | Tight junction-associated protein 1                            |
| Chr19 | 4 | 1 | 3 | 0.000412 | <i>ABHD17A</i>  | Protein ABHD17A                                                |
| Chr7  | 4 | 1 | 3 | 0.000592 | <i>SLTM</i>     | SAFB-like transcription modulator                              |
| Chr16 | 4 | 1 | 3 | 0.002591 | <i>MKS1</i>     | Meckel syndrome type 1 protein                                 |
| Chr12 | 4 | 1 | 3 | 0.003299 | <i>UGT1A1</i>   | UDP-glucuronosyltransferase 1-1                                |
| Chr14 | 4 | 2 | 2 | 3.02E-11 | <i>TIGD3</i>    | Tigger transposable element-derived protein 3                  |
| Chr7  | 4 | 2 | 2 | 1.49E-09 | <i>Irf2bpl</i>  | Interferon regulatory factor 2-binding protein-like            |
| Chr5  | 4 | 2 | 2 | 1.73E-09 | <i>LIAS</i>     | Lipoyl synthase, mitochondrial                                 |
| Chr2  | 4 | 2 | 2 | 1.73E-09 | <i>CEP63</i>    | Centrosomal protein of 63 kDa                                  |
| Chr6  | 4 | 2 | 2 | 2.20E-08 | <i>HMGXB3</i>   | HMG domain-containing protein 3                                |
| Chr3  | 4 | 2 | 2 | 7.91E-08 | <i>IFNAR2</i>   | Interferon alpha/beta receptor 2                               |
| Chr4  | 4 | 2 | 2 | 9.25E-07 | <i>ZKSCAN4</i>  | Zinc finger protein with KRAB and SCAN domains 4               |
| Chr20 | 4 | 2 | 2 | 6.19E-05 | <i>SRCAP</i>    | Helicase SRCAP                                                 |
| Chr8  | 4 | 2 | 2 | 0.000149 | <i>RECQL4</i>   | ATP-dependent DNA helicase Q4                                  |
| Chr3  | 4 | 2 | 2 | 0.000151 | <i>RPL3</i>     | 60S ribosomal protein L3                                       |
| Chr11 | 4 | 2 | 2 | 0.000278 | <i>FAM186B</i>  | Protein FAM186B                                                |
| Chr7  | 4 | 2 | 2 | 0.000366 | <i>CATSPERB</i> | Cation channel sperm-associated protein subunit beta           |
| Chr1  | 4 | 2 | 2 | 0.00083  | <i>SYNC</i>     | Syncoilin                                                      |
| Chr4  | 4 | 2 | 2 | 0.00083  | <i>GAPDH</i>    | Glyceraldehyde-3-phosphate dehydrogenase                       |
| Chr2  | 4 | 2 | 2 | 0.002591 | <i>Tnik</i>     | Traf2 and NCK-interacting protein kinase                       |
| Chr14 | 4 | 2 | 2 | 0.004142 | <i>FANCF</i>    | Fanconi anemia group F protein                                 |
| Chr7  | 4 | 3 | 1 | 8.93E-09 | <i>ADAM21</i>   | Disintegrin and metalloproteinase domain-containing protein 21 |
| Chr14 | 4 | 3 | 1 | 5.36E-06 | <i>UBE4A</i>    | Ubiquitin conjugation factor E4 A                              |
| Chr2  | 4 | 3 | 1 | 1.13E-05 | <i>Krt8</i>     | Keratin, type II cytoskeletal 8                                |
| Chr11 | 4 | 3 | 1 | 0.000182 | <i>SLC9A7</i>   | Sodium/hydrogen exchanger 7                                    |
| Chr6  | 4 | 3 | 1 | 0.000278 | <i>KIF4B</i>    | Chromosome-associated kinesin KIF4B                            |

|       |   |   |   |          |                 |                                                            |
|-------|---|---|---|----------|-----------------|------------------------------------------------------------|
| Chr4  | 4 | 3 | 1 | 0.002003 | <i>CCDC170</i>  | Coiled-coil domain-containing protein 170                  |
| Chr10 | 4 | 3 | 1 | 0.002591 | <i>MAVS</i>     | Mitochondrial antiviral-signaling protein                  |
| Chr7  | 4 | 4 | 0 | 9.94E-14 | <i>BDKRB1</i>   | B1 bradykinin receptor                                     |
| Chr12 | 4 | 4 | 0 | 3.80E-08 | <i>RBM44</i>    | RNA-binding protein 44                                     |
| ChrX  | 4 | 4 | 0 | 1.47E-07 | <i>CXorf49</i>  | Uncharacterized protein CXorf49                            |
| Chr4  | 4 | 4 | 0 | 9.29E-06 | <i>PLG</i>      | Plasminogen                                                |
| Chr12 | 4 | 4 | 0 | 0.000614 | <i>UGT1A9</i>   | UDP-glucuronosyltransferase 1-9                            |
| Chr6  | 4 | 4 | 0 | 0.003299 | <i>SLCO6A1</i>  | Solute carrier organic anion transporter family member 6A1 |
| Chr10 | 4 | 4 | 0 | 0.009938 | <i>LAMA5</i>    | Laminin subunit alpha-5                                    |
| Chr8  | 3 | 0 | 3 | 2.20E-16 | <i>JPH1</i>     | Junctophilin-1                                             |
| Chr3  | 3 | 0 | 3 | 2.20E-16 | <i>GET4</i>     | Golgi to ER traffic protein 4 homolog                      |
| ChrY  | 3 | 0 | 3 | 6.23E-15 | <i>RPS4Y1</i>   | 40S ribosomal protein S4, Y isoform 1                      |
| Chr7  | 3 | 0 | 3 | 1.50E-11 | <i>GALNT16</i>  | Polypeptide N-acetylgalactosaminyltransferase 16           |
| Chr14 | 3 | 0 | 3 | 9.71E-08 | <i>LRRRC10B</i> | Leucine-rich repeat-containing protein 10B                 |
| Chr1  | 3 | 0 | 3 | 3.23E-07 | <i>POU3F1</i>   | POU domain, class 3, transcription factor 1                |
| Chr16 | 3 | 0 | 3 | 9.25E-07 | <i>GHDC</i>     | GH3 domain-containing protein                              |
| Chr4  | 3 | 0 | 3 | 1.55E-06 | <i>Nfya</i>     | Nuclear transcription factor Y subunit alpha               |
| Chr17 | 3 | 0 | 3 | 1.55E-06 | <i>Mab21l1</i>  | Putative nucleotidyltransferase MAB21L1                    |
| ChrX  | 3 | 0 | 3 | 1.55E-06 | <i>SUV39H1</i>  | Histone-lysine N-methyltransferase SUV39H1                 |
| Chr7  | 3 | 0 | 3 | 5.36E-06 | <i>AP3S2</i>    | AP-3 complex subunit sigma-2                               |
| Chr9  | 3 | 0 | 3 | 6.59E-06 | <i>Atad1</i>    | ATPase family AAA domain-containing protein 1              |
| Chr16 | 3 | 0 | 3 | 6.59E-06 | <i>HOXB6</i>    | Homeobox protein Hox-B6                                    |
| Chr4  | 3 | 0 | 3 | 2.16E-05 | <i>RNF5</i>     | E3 ubiquitin-protein ligase RNF5                           |
| Chr4  | 3 | 0 | 3 | 2.19E-05 | <i>ELOVL4</i>   | Elongation of very long chain fatty acids protein 4        |
| Chr5  | 3 | 0 | 3 | 5.80E-05 | <i>ARSJ</i>     | Arylsulfatase J                                            |
| Chr20 | 3 | 0 | 3 | 6.95E-05 | <i>C16orf90</i> | Uncharacterized protein C16orf90                           |
| Chr18 | 3 | 0 | 3 | 6.95E-05 | <i>DCC</i>      | Netrin receptor DCC                                        |
| Chr4  | 3 | 0 | 3 | 6.95E-05 | <i>RARS2</i>    | Probable arginine--tRNA ligase, mitochondrial              |



|       |   |   |   |          |                 |                                                                         |
|-------|---|---|---|----------|-----------------|-------------------------------------------------------------------------|
| Chr4  | 3 | 0 | 3 | 6.95E-05 | <i>TRAPPC3L</i> | Trafficking protein particle complex subunit 3-like protein             |
| Chr8  | 3 | 0 | 3 | 0.000277 | <i>PPP1R42</i>  | Protein phosphatase 1 regulatory subunit 42                             |
| Chr4  | 3 | 0 | 3 | 0.000278 | <i>SCAF8</i>    | Protein SCAF8                                                           |
| Chr2  | 3 | 0 | 3 | 0.000519 | <i>SS18L2</i>   | SS18-like protein 2                                                     |
| Chr11 | 3 | 0 | 3 | 0.000519 | <i>Myl6</i>     | Myosin light polypeptide 6                                              |
| Chr16 | 3 | 0 | 3 | 0.00083  | <i>FADS6</i>    | Fatty acid desaturase 6                                                 |
| ChrX  | 3 | 0 | 3 | 0.000899 | <i>RAB5A</i>    | Ras-related protein Rab-5A                                              |
| Chr1  | 3 | 0 | 3 | 0.000899 | <i>DCLRE1B</i>  | 5' exonuclease Apollo                                                   |
| Chr2  | 3 | 0 | 3 | 0.000899 | <i>RASSF1</i>   | Ras association domain-containing protein 1                             |
| Chr6  | 3 | 0 | 3 | 0.000899 | <i>PPP2CA</i>   | Serine/threonine-protein phosphatase 2A catalytic subunit alpha isoform |
| Chr14 | 3 | 0 | 3 | 0.001462 | <i>SLC25A22</i> | Mitochondrial glutamate carrier 1                                       |
| Chr7  | 3 | 0 | 3 | 0.002256 | <i>SUSD6</i>    | Sushi domain-containing protein 6                                       |
| Chr16 | 3 | 0 | 3 | 0.003299 | <i>HID1</i>     | Protein HID1                                                            |
| Chr5  | 3 | 0 | 3 | 0.003299 | <i>PCDH10</i>   | Protocadherin-10                                                        |
| Chr1  | 3 | 0 | 3 | 0.003328 | <i>AP4B1</i>    | AP-4 complex subunit beta-1                                             |
| Chr14 | 3 | 0 | 3 | 0.003328 | <i>GATD1</i>    | Glutamine amidotransferase-like class 1 domain-containing protein 1     |
| Chr7  | 3 | 0 | 3 | 0.006491 | <i>MIPOL1</i>   | Mirror-image polydactyly gene 1 protein                                 |
| Chr2  | 3 | 0 | 3 | 0.006491 | <i>SLC25A20</i> | Mitochondrial carnitine/acylcarnitine carrier protein                   |
| Chr5  | 3 | 0 | 3 | 0.008669 | <i>RPL9</i>     | 60S ribosomal protein L9                                                |
| Chr7  | 3 | 0 | 3 | 0.008669 | <i>FURIN</i>    | Furin                                                                   |
| Chr11 | 3 | 0 | 3 | 0.008669 | <i>KLRC4</i>    | NKG2-F type II integral membrane protein                                |
| Chr9  | 3 | 0 | 3 | 0.008669 | <i>SLC16A9</i>  | Monocarboxylate transporter 9                                           |
| Chr10 | 3 | 0 | 3 | 0.008669 | <i>RSPH14</i>   | Radial spoke head 14 homolog                                            |
| Chr19 | 3 | 0 | 3 | 0.008669 | <i>YJEFN3</i>   | YjeF N-terminal domain-containing protein 3                             |
| Chr1  | 3 | 1 | 2 | 6.42E-14 | <i>SUCO</i>     | SUN domain-containing ossification factor                               |
| Chr4  | 3 | 1 | 2 | 9.25E-07 | <i>GPANK1</i>   | G patch domain and ankyrin repeat-containing protein 1                  |
| Chr11 | 3 | 1 | 2 | 9.40E-07 | <i>NR4A1</i>    | Nuclear receptor subfamily 4 group A member 1                           |
| Chr14 | 3 | 1 | 2 | 2.34E-06 | <i>OR51I2</i>   | Olfactory receptor 51I2                                                 |

|       |   |   |   |          |                 |                                                                  |
|-------|---|---|---|----------|-----------------|------------------------------------------------------------------|
| Chr10 | 3 | 1 | 2 | 3.07E-06 | <i>INPP5J</i>   | Phosphatidylinositol 4,5-bisphosphate 5-phosphatase A            |
| Chr19 | 3 | 1 | 2 | 5.57E-06 | <i>VAV1</i>     | Proto-oncogene vav                                               |
| Chr6  | 3 | 1 | 2 | 2.16E-05 | <i>CENPK</i>    | Centromere protein K                                             |
| Chr1  | 3 | 1 | 2 | 2.19E-05 | <i>TDRD10</i>   | Tudor domain-containing protein 10                               |
| Chr1  | 3 | 1 | 2 | 2.34E-05 | <i>JAK1</i>     | Tyrosine-protein kinase JAK1                                     |
| Chr13 | 3 | 1 | 2 | 0.000182 | <i>MTIF2</i>    | Translation initiation factor IF-2, mitochondrial                |
| ChrX  | 3 | 1 | 2 | 0.000277 | <i>CLDN2</i>    | Claudin-2                                                        |
| Chr4  | 3 | 1 | 2 | 0.000278 | <i>ZNF322</i>   | Zinc finger protein 322                                          |
| Chr4  | 3 | 1 | 2 | 0.000519 | <i>HIST1H1B</i> | Histone H1.5                                                     |
| ChrX  | 3 | 1 | 2 | 0.000519 | <i>SIAH1</i>    | E3 ubiquitin-protein ligase SIAH1                                |
| Chr12 | 3 | 1 | 2 | 0.000592 | <i>ALPI</i>     | Intestinal-type alkaline phosphatase                             |
| Chr19 | 3 | 1 | 2 | 0.000592 | <i>EMC10</i>    | ER membrane protein complex subunit 10                           |
| Chr10 | 3 | 1 | 2 | 0.001136 | <i>SEC14L4</i>  | SEC14-like protein 4                                             |
| Chr4  | 3 | 1 | 2 | 0.001136 | <i>TBC1D32</i>  | Protein broad-minded                                             |
| Chr8  | 3 | 1 | 2 | 0.001462 | <i>TMEM68</i>   | Transmembrane protein 68                                         |
| Chr1  | 3 | 1 | 2 | 0.001842 | <i>INTS11</i>   | Integrator complex subunit 11                                    |
| Chr6  | 3 | 1 | 2 | 0.002256 | <i>CSF2</i>     | Granulocyte-macrophage colony-stimulating factor                 |
| Chr8  | 3 | 1 | 2 | 0.003328 | <i>SPAG1</i>    | Sperm-associated antigen 1                                       |
| Chr16 | 3 | 1 | 2 | 0.003328 | <i>GGNBP2</i>   | Gametogenetin-binding protein 2                                  |
| Chr9  | 3 | 1 | 2 | 0.003328 | <i>EBLN1</i>    | Endogenous Bornavirus-like nucleoprotein 1                       |
| Chr19 | 3 | 1 | 2 | 0.004443 | <i>ERCC2</i>    | TFIIH basal transcription factor complex helicase XPD subunit    |
| Chr17 | 3 | 1 | 2 | 0.004724 | <i>ZIC5</i>     | Zinc finger protein ZIC 5                                        |
| Chr19 | 3 | 1 | 2 | 0.006491 | <i>ZNF844</i>   | Zinc finger protein 844                                          |
| Chr14 | 3 | 1 | 2 | 0.008669 | <i>FOXRED1</i>  | FAD-dependent oxidoreductase domain-containing protein 1         |
| Chr19 | 3 | 1 | 2 | 0.008669 | <i>SYT5</i>     | Synaptotagmin-5                                                  |
| Chr3  | 3 | 1 | 2 | 0.008669 | <i>SLC25A13</i> | Calcium-binding mitochondrial carrier protein Aralar2            |
| Chr9  | 3 | 2 | 1 | 3.84E-10 | <i>JMJD1C</i>   | Probable JmjC domain-containing histone demethylation protein 2C |
| ChrY  | 3 | 2 | 1 | 6.59E-06 | <i>RBMY1F</i>   | RNA-binding motif protein, Y chromosome, family 1 member F/J     |

|       |   |   |   |          |                |                                                                         |
|-------|---|---|---|----------|----------------|-------------------------------------------------------------------------|
| Chr11 | 3 | 2 | 1 | 1.13E-05 | <i>NEUROD4</i> | Neurogenic differentiation factor 4                                     |
| Chr19 | 3 | 2 | 1 | 1.44E-05 | <i>SBNO2</i>   | Protein strawberry notch homolog 2                                      |
| Chr10 | 3 | 2 | 1 | 0.000135 | <i>WFDC2</i>   | WAP four-disulfide core domain protein 2                                |
| Chr9  | 3 | 2 | 1 | 0.000182 | <i>USP54</i>   | Inactive ubiquitin carboxyl-terminal hydrolase 54                       |
| Chr11 | 3 | 2 | 1 | 0.000278 | <i>CSRNP2</i>  | Cysteine/serine-rich nuclear protein 2                                  |
| Chr4  | 3 | 2 | 1 | 0.001136 | <i>PRSS16</i>  | Thymus-specific serine protease                                         |
| Chr20 | 3 | 2 | 1 | 0.001136 | <i>RNF40</i>   | E3 ubiquitin-protein ligase BRE1B                                       |
| Chr20 | 3 | 2 | 1 | 0.001462 | <i>SPATA33</i> | Spermatogenesis-associated protein 33                                   |
| Chr14 | 3 | 2 | 1 | 0.002256 | <i>ZFPL1</i>   | Zinc finger protein-like 1                                              |
| Chr10 | 3 | 2 | 1 | 0.002475 | <i>CABIN1</i>  | Calcineurin-binding protein cabin-1                                     |
| Chr17 | 3 | 2 | 1 | 0.003328 | <i>EFNB2</i>   | Ephrin-B2                                                               |
| Chr11 | 3 | 2 | 1 | 0.004142 | <i>B3GNT4</i>  | N-acetyllactosaminide beta-1,3-N-acetylglucosaminyltransferase 4        |
| Chr9  | 3 | 2 | 1 | 0.006491 | <i>VSIR</i>    | V-type immunoglobulin domain-containing suppressor of T-cell activation |
| Chr11 | 3 | 2 | 1 | 0.008669 | <i>C3AR1</i>   | C3a anaphylatoxin chemotactic receptor                                  |
| Chr17 | 3 | 2 | 1 | 0.009463 | <i>AKAP11</i>  | A-kinase anchor protein 11                                              |
| Chr10 | 3 | 3 | 0 | 1.07E-13 | <i>SBF1</i>    | Myotubularin-related protein 5                                          |
| Chr7  | 3 | 3 | 0 | 2.64E-07 | <i>ADAM20</i>  | Disintegrin and metalloproteinase domain-containing protein 20          |
| Chr14 | 3 | 3 | 0 | 2.26E-05 | <i>DNHD1</i>   | Dynein heavy chain domain-containing protein 1                          |
| Chr14 | 3 | 3 | 0 | 7.64E-05 | <i>DNHD1</i>   | Dynein heavy chain domain-containing protein 1                          |
| Chr10 | 3 | 3 | 0 | 0.000151 | <i>FASTKD5</i> | FAST kinase domain-containing protein 5, mitochondrial                  |
| Chr1  | 3 | 3 | 0 | 0.000412 | <i>THBS3</i>   | Thrombospondin-3                                                        |
| Chr2  | 3 | 3 | 0 | 0.000614 | <i>VILL</i>    | Villin-like protein                                                     |
| Chr3  | 3 | 3 | 0 | 0.002678 | <i>CYP3A7</i>  | Cytochrome P450 3A7                                                     |
| Chr19 | 3 | 3 | 0 | 0.004443 | <i>CD22</i>    | B-cell receptor CD22                                                    |
| Chr9  | 3 | 3 | 0 | 0.004724 | <i>PTCHD3</i>  | Patched domain-containing protein 3                                     |

**Table S15. Gene ontology enrichment analyses based on the 216 PSGs identified in the comparison *fascicularis-sinica* versus *silenus* group.** The top 40 most significant categories ( $P$ -value  $<0.05$ ) from the over-representation analysis are reported. The categories related to reproductive functions are highlighted in red.

| GeneSet ID | Description                                                                  | Enrichment Ratio | P-value  | Database           | No. of genes | Genes                                                                                                                                                                            |
|------------|------------------------------------------------------------------------------|------------------|----------|--------------------|--------------|----------------------------------------------------------------------------------------------------------------------------------------------------------------------------------|
| GO:0048232 | Male gamete generation                                                       | 3.034933822      | 8.02E-05 | Biological_Process | 16           | <i>WDR48;KIF18A;MLH3;IFT81;KNL1;DMRTC2;USP9Y;POC1A;CATSPERB;FANCF;SIAH1;GGNBP2;RBMY1F;WFDC2;SBF1;PTCHD3</i>                                                                      |
| GO:0019953 | Sexual reproduction                                                          | 2.507521542      | 1.42E-04 | Biological_Process | 20           | <i>WDR48;KIF18A;MLH3;IFT81;KNL1;PLPP1;DMRTC2;USP9Y;POC1A;CATSPERB;FANCF;ADAM21;SIAH1;SPAG1;GGNBP2;RBMY1F;WFDC2;SBF1;ADAM20;PTCHD3</i>                                            |
| HP:0012447 | Abnormal myelination                                                         | 3.720040183      | 1.95E-04 | Human_Ontology     | 11           | <i>PGAP1;TMEM126B;GEMIN4;SLC30A10;LIAS;JPH1;ELOVL4;SLC25A22;ERCC2;FOXRED1;SBF1</i>                                                                                               |
| GO:0051567 | Histone H3-K9 methylation                                                    | 12.8510479       | 2.51E-04 | Biological_Process | 4            | <i>KDM4C;DMRTC2;SUV39H1;HIST1H1B</i>                                                                                                                                             |
| GO:0060831 | Smoothed signaling pathway involved in dorsal/ventral neural tube patterning | 22.03036784      | 3.04E-04 | Biological_Process | 3            | <i>TRAF3IP1;MKS1;TBC1D32</i>                                                                                                                                                     |
| GO:0007276 | Gamete generation                                                            | 2.58924817       | 3.19E-04 | Biological_Process | 17           | <i>WDR48;KIF18A;MLH3;IFT81;KNL1;PLPP1;DMRTC2;USP9Y;POC1A;CATSPERB;FANCF;SIAH1;GGNBP2;RBMY1F;WFDC2;SBF1;PTCHD3</i>                                                                |
| HP:0100326 | Immunologic hypersensitivity                                                 | 6.493161046      | 3.29E-04 | Human_Ontology     | 6            | <i>GPR35;SRCAP;ELOVL4;KLRC4;ERCC2;JMJD1C</i>                                                                                                                                     |
| GO:0036124 | Histone H3-K9 trimethylation                                                 | 18.14265586      | 5.56E-04 | Biological_Process | 3            | <i>KDM4C;DMRTC2;SUV39H1</i>                                                                                                                                                      |
| GO:0007283 | Spermatogenesis                                                              | 2.746788865      | 6.15E-04 | Biological_Process | 14           | <i>WDR48;IFT81;KNL1;DMRTC2;USP9Y;POC1A;CATSPERB;FANCF;SIAH1;GGNBP2;RBMY1F;WFDC2;SBF1;PTCHD3</i>                                                                                  |
| HP:0100022 | Abnormality of movement                                                      | 1.892593511      | 7.43E-04 | Human_Ontology     | 28           | <i>TTN;MLH3;DNAJB6;KNL1;TMEM126B;GEMIN4;CA8;FLVCR2;SLC30A10;CRBN;POC1A;MKS1;UGT1A1;LIAS;CEP63;FANCF;PLG;JPH1;ELOVL4;DCC;RARS2;SLC25A22;AP4B1;KLRC4;ERCC2;FOXRED1;JMJD1C;SBF1</i> |
| HP:0002921 | Abnormality of the cerebrospinal fluid                                       | 3.150117592      | 7.93E-04 | Human_Ontology     | 11           | <i>TMEM126B;FLVCR2;OSTM1;MKS1;RECL4;FANCF;PLG;RARS2;ERCC2;FOXRED1;JMJD1C</i>                                                                                                     |
| HP:0100513 | Vitamin E deficiency                                                         | 41.12335329      | 9.23E-04 | Human_Ontology     | 2            | <i>GPR35;SLC30A10</i>                                                                                                                                                            |
| GO:0061647 | Histone H3-K9 modification                                                   | 9.138522954      | 9.43E-04 | Biological_Process | 4            | <i>KDM4C;DMRTC2;SUV39H1;HIST1H1B</i>                                                                                                                                             |
| HP:0003819 | Death in childhood                                                           | 14.01932499      | 0.001215 | Human_Ontology     | 3            | <i>RARS2;SLC25A22;ERCC2</i>                                                                                                                                                      |
| HP:0100514 | Abnormality of vitamin E metabolism                                          | 34.26946108      | 0.001375 | Human_Ontology     | 2            | <i>GPR35;SLC30A10</i>                                                                                                                                                            |

|            |                                                                                            |             |          |                    |    |                                                                                                                                                                                                                   |
|------------|--------------------------------------------------------------------------------------------|-------------|----------|--------------------|----|-------------------------------------------------------------------------------------------------------------------------------------------------------------------------------------------------------------------|
| GO:1902525 | Regulation of protein monoubiquitination                                                   | 34.26946108 | 0.001375 | Biological_Process | 2  | <i>WDR48;PEF1</i>                                                                                                                                                                                                 |
| GO:0016255 | Attachment of GPI anchor to protein                                                        | 34.26946108 | 0.001375 | Biological_Process | 2  | <i>PGAP1;PIGS</i>                                                                                                                                                                                                 |
| GO:0051552 | Flavone metabolic process                                                                  | 34.26946108 | 0.001375 | Biological_Process | 2  | <i>UGT1A1;UGT1A9</i>                                                                                                                                                                                              |
| GO:0051570 | Regulation of histone H3-K9 methylation                                                    | 13.40978912 | 0.001387 | Biological_Process | 3  | <i>KDM4C;DMRTC2;HIST1H1B</i>                                                                                                                                                                                      |
| GO:0044703 | Multi-organism reproductive process                                                        | 2.085362743 | 0.001468 | Biological_Process | 20 | <i>WDR48;KIF18A;MLH3;IFT81;KNLI;PLPP1;DMRTC2;USP9Y;POC1A;CATSPERB;FANCF;ADAM21;SIAH1;SPAG1;GGNBP2;RBMY1F;WFDC2;SBF1;ADAM20;PTCHD3</i>                                                                             |
| GO:0021904 | Dorsal/ventral neural tube patterning                                                      | 12.8510479  | 0.001574 | Biological_Process | 3  | <i>TRAF3IP1;MKS1;TBC1D32</i>                                                                                                                                                                                      |
| HP:0012759 | Neurodevelopmental abnormality                                                             | 1.696338323 | 0.001582 | Human_Ontology     | 33 | <i>TTN;MLH3;TRAF3IP1;WIPF1;KNLI;PGAP1;TMEM126B;GEMIN4;MAGT1;CA8;FLVCR2;ECE1;CRBN;POC1A;MKS1;UGT1A1;LIAS;CEP63;SRCAP;RECQL4;FANCF;PLG;ELOVL4;DCC;RARS2;SLC25A22;AP4B1;SLC25A20;KLRC4;ERCC2;FOXRED1;JMJD1C;SBF1</i> |
| HP:0000240 | Abnormality of skull size                                                                  | 2.045937975 | 0.001839 | Human_Ontology     | 20 | <i>IFT81;KNLI;PGAP1;TMEM126B;SLC30A10;POC1A;MKS1;LIAS;CEP63;FANCF;PLG;ELOVL4;RARS2;SLC25A22;AP4B1;SLC25A20;ERCC2;FOXRED1;JMJD1C;SBF1</i>                                                                          |
| GO:0036123 | Histone H3-K9 dimethylation                                                                | 29.37382378 | 0.001913 | Biological_Process | 2  | <i>DMRTC2;SUV39H1</i>                                                                                                                                                                                             |
| HP:0001263 | Global developmental delay                                                                 | 1.887145103 | 0.002385 | Human_Ontology     | 23 | <i>TRAF3IP1;KNLI;PGAP1;TMEM126B;GEMIN4;FLVCR2;CRBN;POC1A;MKS1;LIAS;CEP63;SRCAP;FANCF;PLG;ELOVL4;DCC;RARS2;SLC25A22;AP4B1;SLC25A20;ERCC2;FOXRED1;JMJD1C</i>                                                        |
| GO:0048609 | Multicellular organismal reproductive process                                              | 2.149744791 | 0.002449 | Biological_Process | 17 | <i>WDR48;KIF18A;MLH3;IFT81;KNLI;PLPP1;DMRTC2;USP9Y;POC1A;CATSPERB;FANCF;SIAH1;GGNBP2;RBMY1F;WFDC2;SBF1;PTCHD3</i>                                                                                                 |
| HP:0002672 | Gastrointestinal carcinoma                                                                 | 11.01518392 | 0.002476 | Human_Ontology     | 3  | <i>MLH3;GPR35;DCC</i>                                                                                                                                                                                             |
| HP:0006749 | Malignant gastrointestinal tract tumors                                                    | 11.01518392 | 0.002476 | Human_Ontology     | 3  | <i>MLH3;GPR35;DCC</i>                                                                                                                                                                                             |
| HP:0012758 | Neurodevelopmental delay                                                                   | 1.793971788 | 0.002486 | Human_Ontology     | 26 | <i>TTN;TRAF3IP1;KNLI;PGAP1;TMEM126B;GEMIN4;MAGT1;FLVCR2;CRBN;POC1A;MKS1;UGT1A1;LIAS;CEP63;SRCAP;FANCF;PLG;ELOVL4;DCC;RARS2;SLC25A22;AP4B1;SLC25A20;ERCC2;FOXRED1;JMJD1C</i>                                       |
| GO:1901620 | Regulation of smoothed signaling pathway involved in dorsal/ventral neural tube patterning | 25.70209581 | 0.002534 | Biological_Process | 2  | <i>TRAF3IP1;MKS1</i>                                                                                                                                                                                              |
| GO:0070778 | L-aspartate transmembrane transport                                                        | 25.70209581 | 0.002534 | Biological_Process | 2  | <i>SLC25A22;SLC25A13</i>                                                                                                                                                                                          |

|            |                                       |             |          |                    |    |                                                                                                                                                          |
|------------|---------------------------------------|-------------|----------|--------------------|----|----------------------------------------------------------------------------------------------------------------------------------------------------------|
| HP:0031826 | Abnormal reflex                       | 2.067654635 | 0.002785 | Human_Ontology     | 18 | <i>TTN;MLH3;KNL1;TMEM126B;CA8;CEP63;FANCF;PLG;JPH1;ELOVL4;DCC;RARS2;SLC25A22;AP4B1;KLRC4;ERCC2;FOXRED1;SBF1</i>                                          |
| HP:0007364 | Aplasia/Hypoplasia of the cerebrum    | 2.013772455 | 0.002855 | Human_Ontology     | 19 | <i>KNL1;PGAP1;FLVCR2;SLC30A10;POCIA;MKS1;LIAS;CEP63;RECQL4;FANCF;ELOVL4;DCC;RARS2;SLC25A22;AP4B1;SLC25A20;ERCC2;JMJD1C;SBF1</i>                          |
| GO:0042733 | Embryonic digit morphogenesis         | 6.741533327 | 0.002928 | Biological_Process | 4  | <i>TRAF3IP1;ECE1;MKS1;TBC1D32</i>                                                                                                                        |
| HP:0002242 | Abnormal intestine morphology         | 2.421211924 | 0.002932 | Human_Ontology     | 13 | <i>MLH3;WIPF1;GPR35;ECE1;MKS1;SRCAP;RECQL4;FANCF;PLG;DCC;KLRC4;ERCC2;JMJD1C</i>                                                                          |
| GO:0032504 | Multicellular organism reproduction   | 2.110800139 | 0.002955 | Biological_Process | 17 | <i>WDR48;KIF18A;MLH3;IFT81;KNL1;PLPP1;DMRTC2;USP9Y;POCIA;CATSPERB;FANCF;SIAH1;GGNBP2;RBMY1F;WFDC2;SBF1;PTCHD3</i>                                        |
| HP:0011446 | Abnormality of higher mental function | 1.884820359 | 0.003019 | Human_Ontology     | 22 | <i>TTN;MLH3;DNAJB6;PGAP1;TMEM126B;GEMIN4;CA8;SLC30A10;MKS1;UGT1A1;SRCAP;ELOVL4;DCC;RARS2;SLC25A22;AP4B1;SLC25A20;KLRC4;ERCC2;FOXRED1;SLC25A13;JMJD1C</i> |
| HP:0100021 | Cerebral palsy                        | 10.28083832 | 0.003026 | Human_Ontology     | 3  | <i>CA8;UGT1A1;DCC</i>                                                                                                                                    |
| GO:0015810 | Aspartate transmembrane transport     | 22.84630739 | 0.003237 | Biological_Process | 2  | <i>SLC25A22;SLC25A13</i>                                                                                                                                 |
| GO:0052696 | Flavonoid glucuronidation             | 22.84630739 | 0.003237 | Biological_Process | 2  | <i>UGT1A1;UGT1A9</i>                                                                                                                                     |

---

**Table S16. PSGs identified in the comparison *fascicularis-silenus* versus *sinica* groups with *P*-value <0.01(after Yates' correction), a top 2.5% number of fixed non-synonymous mutations and fixed 1 kb upstream differences.** The phylogenetic analysis supports the sister relationship between the *fascicularis* and *silenus* groups. Genes were sorted by the sum of the fixed number of non-synonymous mutations (FixNonSyn) and fixed 1-kb upstream mutations (Fix1kup).

| Chromosome | Num<br>FixNonSyn+Fix1kup | Num<br>FixNonSyn | Num<br>Fix1kup | P-value  | Gene<br>Symbol  | Full Name                                                            |
|------------|--------------------------|------------------|----------------|----------|-----------------|----------------------------------------------------------------------|
| Chr1       | 14                       | 11               | 3              | 2.20E-16 | <i>SYDE2</i>    | Rho GTPase-activating protein SYDE2                                  |
| Chr19      | 13                       | 12               | 1              | 2.81E-12 | <i>WDR87</i>    | WD repeat-containing protein 87                                      |
| Chr4       | 13                       | 6                | 7              | 2.20E-16 | <i>ZNF318</i>   | Zinc finger protein 318                                              |
| Chr1       | 12                       | 2                | 10             | 2.20E-16 | <i>PRG4</i>     | Proteoglycan 4                                                       |
| Chr13      | 10                       | 9                | 1              | 1.81E-07 | <i>C2orf16</i>  | Uncharacterized protein C2orf16                                      |
| Chr7       | 10                       | 1                | 9              | 2.20E-16 | <i>NEK9</i>     | Serine/threonine-protein kinase Nek9                                 |
| Chr14      | 10                       | 0                | 10             | 2.20E-16 | <i>TEX12</i>    | Testis-expressed protein 12                                          |
| Chr18      | 10                       | 0                | 10             | 2.20E-16 | <i>CABYR</i>    | Calcium-binding tyrosine phosphorylation-regulated protein isoform c |
| Chr10      | 9                        | 9                | 0              | 2.20E-16 | <i>CHD6</i>     | Chromodomain-helicase-DNA-binding protein 6                          |
| Chr10      | 9                        | 0                | 9              | 2.82E-15 | <i>GSTT1</i>    | Glutathione S-transferase theta-1                                    |
| Chr1       | 8                        | 8                | 0              | 0.000614 | <i>AHCTF1</i>   | Protein ELYS                                                         |
| Chr13      | 8                        | 7                | 1              | 1.62E-07 | <i>RAD51AP2</i> | RAD51-associated protein 2                                           |
| Chr3       | 8                        | 3                | 5              | 6.40E-14 | <i>Upk3b</i>    | Uroplakin-3b                                                         |
| Chr15      | 8                        | 1                | 7              | 1.03E-05 | <i>EML2</i>     | Echinoderm microtubule-associated protein-like 2                     |
| Chr1       | 8                        | 0                | 8              | 2.20E-16 | <i>ZC3H12A</i>  | Endoribonuclease ZC3H12A                                             |
| Chr7       | 8                        | 0                | 8              | 1.21E-14 | <i>EMC4</i>     | ER membrane protein complex subunit 4                                |
| Chr12      | 8                        | 0                | 8              | 3.98E-13 | <i>COL5A2</i>   | Collagen alpha-2(V) chain                                            |
| Chr20      | 8                        | 0                | 8              | 8.19E-11 | <i>VPS35</i>    | Vacuolar protein sorting-associated protein 35                       |
| Chr19      | 7                        | 7                | 0              | 2.20E-16 | <i>ZNF274</i>   | Neurotrophin receptor-interacting factor homolog                     |
| Chr16      | 7                        | 5                | 2              | 0.0018   | <i>GPR179</i>   | Probable G-protein coupled receptor 179                              |

|       |   |   |   |          |                 |                                                                      |
|-------|---|---|---|----------|-----------------|----------------------------------------------------------------------|
| Chr15 | 7 | 4 | 3 | 5.02E-14 | <i>PIGO</i>     | GPI ethanolamine phosphate transferase 3                             |
| Chr7  | 7 | 4 | 3 | 2.34E-12 | <i>MGA</i>      | MAX gene-associated protein                                          |
| Chr9  | 7 | 4 | 3 | 3.92E-08 | <i>EIF4B</i>    | Eukaryotic translation initiation factor 4B                          |
| Chr14 | 7 | 4 | 3 | 3.61E-07 | <i>PITPNM1</i>  | Membrane-associated phosphatidylinositol transfer protein 1          |
| Chr15 | 7 | 3 | 4 | 3.95E-13 | <i>C9orf131</i> | Uncharacterized protein C9orf131                                     |
| Chr12 | 7 | 2 | 5 | 2.20E-16 | <i>MFSD6</i>    | Major facilitator superfamily domain-containing protein 6            |
| Chr14 | 7 | 2 | 5 | 2.20E-16 | <i>PIDD1</i>    | p53-induced death domain-containing protein 1                        |
| Chr9  | 7 | 2 | 5 | 2.82E-15 | <i>ZFYVE27</i>  | Protrudin                                                            |
| Chr7  | 7 | 2 | 5 | 4.82E-08 | <i>HERC1</i>    | Probable E3 ubiquitin-protein ligase HERC1                           |
| Chr5  | 7 | 2 | 5 | 9.19E-08 | <i>SHROOM3</i>  | Protein Shroom3                                                      |
| Chr7  | 7 | 1 | 6 | 1.21E-15 | <i>TOGARAM1</i> | TOG array regulator of axonemal microtubules protein 1               |
| Chr3  | 7 | 1 | 6 | 7.37E-08 | <i>AIRE</i>     | Autoimmune regulator                                                 |
| Chr16 | 7 | 0 | 7 | 2.20E-16 | <i>PSMD12</i>   | 26S proteasome non-ATPase regulatory subunit 12                      |
| Chr2  | 7 | 0 | 7 | 2.39E-14 | <i>GHSR</i>     | Growth hormone secretagogue receptor type 1                          |
| Chr7  | 7 | 0 | 7 | 2.02E-12 | <i>USP3</i>     | Ubiquitin carboxyl-terminal hydrolase 3                              |
| Chr10 | 7 | 0 | 7 | 3.80E-11 | <i>PROKR2</i>   | Prokineticin receptor 2                                              |
| Chr10 | 7 | 0 | 7 | 1.54E-09 | <i>PAK5</i>     | Serine/threonine-protein kinase PAK 5                                |
| Chr7  | 7 | 0 | 7 | 2.20E-08 | <i>NEIL1</i>    | Endonuclease 8-like 1                                                |
| Chr6  | 6 | 6 | 0 | 0.002642 | <i>PCDHA3</i>   | Protocadherin alpha-3                                                |
| Chr7  | 6 | 3 | 3 | 1.63E-13 | <i>RPGRIP1</i>  | X-linked retinitis pigmentosa GTPase regulator-interacting protein 1 |
| Chr3  | 6 | 2 | 4 | 3.98E-14 | <i>LHFPL3</i>   | Lipoma HMGIC fusion partner-like 3 protein                           |
| Chr17 | 6 | 2 | 4 | 2.38E-09 | <i>SUPT20H</i>  | Transcription factor SPT20 homolog                                   |
| Chr8  | 6 | 2 | 4 | 3.13E-06 | <i>Eppk1</i>    | Epiplakin                                                            |
| Chr3  | 6 | 2 | 4 | 0.005234 | <i>SDK1</i>     | Protein sidekick-1                                                   |
| Chr3  | 6 | 1 | 5 | 3.92E-08 | <i>EPHA1</i>    | Ephrin type-A receptor 1                                             |
| Chr2  | 6 | 1 | 5 | 2.20E-07 | <i>LPP</i>      | Lipoma-preferred partner                                             |
| Chr6  | 6 | 1 | 5 | 0.000181 | <i>GEMIN5</i>   | Gem-associated protein 5                                             |
| Chr19 | 6 | 0 | 6 | 8.19E-11 | <i>LMNB2</i>    | Lamin-B2                                                             |



|       |   |   |   |          |                  |                                                                                        |
|-------|---|---|---|----------|------------------|----------------------------------------------------------------------------------------|
| Chr10 | 6 | 0 | 6 | 1.31E-10 | <i>OVOL2</i>     | Transcription factor Ovo-like 2                                                        |
| Chr10 | 6 | 0 | 6 | 8.97E-10 | <i>ERGIC3</i>    | Endoplasmic reticulum-Golgi intermediate compartment protein 3                         |
| Chr6  | 6 | 0 | 6 | 1.34E-08 | <i>TCF7</i>      | Transcription factor 7                                                                 |
| Chr19 | 6 | 0 | 6 | 5.98E-08 | <i>IZUMO4</i>    | Izumo sperm-egg fusion protein 4                                                       |
| Chr9  | 6 | 0 | 6 | 3.96E-07 | <i>TMEM72</i>    | Transmembrane protein 72                                                               |
| Chr5  | 6 | 0 | 6 | 1.16E-06 | <i>PDHA2</i>     | Pyruvate dehydrogenase E1 component subunit alpha, testis-specific form, mitochondrial |
| Chr14 | 6 | 0 | 6 | 3.05E-05 | <i>TKFC</i>      | Triokinase/FMN cyclase                                                                 |
| Chr6  | 5 | 5 | 0 | 2.20E-08 | <i>PRLR</i>      | Prolactin receptor                                                                     |
| Chr6  | 5 | 5 | 0 | 6.60E-05 | <i>PCDHA13</i>   | Protocadherin alpha-13                                                                 |
| Chr7  | 5 | 5 | 0 | 0.000817 | <i>AKAP13</i>    | A-kinase anchor protein 13                                                             |
| ChrX  | 5 | 4 | 1 | 4.05E-06 | <i>GVQW1</i>     | Protein GVQW1                                                                          |
| Chr2  | 5 | 4 | 1 | 0.002376 | <i>BSN</i>       | Protein bassoon                                                                        |
| Chr13 | 5 | 3 | 2 | 4.68E-06 | <i>RANBP2</i>    | E3 SUMO-protein ligase RanBP2                                                          |
| Chr16 | 5 | 3 | 2 | 4.21E-05 | <i>AATF</i>      | Protein AATF                                                                           |
| Chr7  | 5 | 3 | 2 | 6.95E-05 | <i>C8orf44</i>   | Putative uncharacterized protein C8orf44                                               |
| Chr7  | 5 | 2 | 3 | 2.20E-16 | <i>DDHD1</i>     | Phospholipase DDHD1                                                                    |
| Chr7  | 5 | 2 | 3 | 3.11E-10 | <i>TRIP4</i>     | Activating signal cointegrator 1                                                       |
| Chr18 | 5 | 2 | 3 | 8.97E-10 | <i>CABYR</i>     | Calcium-binding tyrosine phosphorylation-regulated protein                             |
| Chr7  | 5 | 2 | 3 | 3.01E-08 | <i>TP53BP1</i>   | TP53-binding protein 1                                                                 |
| Chr20 | 5 | 2 | 3 | 2.17E-05 | <i>PRSS53</i>    | Serine protease 53                                                                     |
| Chr9  | 5 | 2 | 3 | 4.21E-05 | <i>C10orf142</i> | Uncharacterized protein C10orf142                                                      |
| Chr15 | 5 | 2 | 3 | 0.004178 | <i>GBGT1</i>     | Globoside alpha-1,3-N-acetylgalactosaminyltransferase 1                                |
| Chr12 | 5 | 2 | 3 | 0.005788 | <i>TIGD1</i>     | Tigger transposable element-derived protein 1                                          |
| Chr11 | 5 | 1 | 4 | 1.49E-13 | <i>FMNL3</i>     | Formin-like protein 3                                                                  |
| Chr16 | 5 | 1 | 4 | 4.30E-08 | <i>SP6</i>       | Transcription factor Sp6                                                               |
| Chr8  | 5 | 1 | 4 | 5.98E-08 | <i>TM2D2</i>     | TM2 domain-containing protein 2                                                        |
| Chr5  | 5 | 1 | 4 | 1.14E-07 | <i>LARP7</i>     | La-related protein 7                                                                   |
| Chr20 | 5 | 1 | 4 | 9.04E-07 | <i>SRRM2</i>     | Serine/arginine repetitive matrix protein 2                                            |

|       |   |   |   |          |                 |                                                                                                     |
|-------|---|---|---|----------|-----------------|-----------------------------------------------------------------------------------------------------|
| Chr20 | 5 | 1 | 4 | 1.89E-06 | <i>ADAT1</i>    | tRNA-specific adenosine deaminase 1                                                                 |
| Chr14 | 5 | 1 | 4 | 2.21E-06 | <i>HARB11</i>   | Putative nuclease HARB11                                                                            |
| Chr1  | 5 | 1 | 4 | 4.05E-06 | <i>TTC13</i>    | Tetratricopeptide repeat protein 13                                                                 |
| Chr19 | 5 | 1 | 4 | 6.95E-05 | <i>RASGRP4</i>  | RAS guanyl-releasing protein 4                                                                      |
| Chr1  | 5 | 1 | 4 | 0.000101 | <i>MPL</i>      | Thrombopoietin receptor                                                                             |
| Chr3  | 5 | 1 | 4 | 0.000351 | <i>EPHB4</i>    | Ephrin type-B receptor 4                                                                            |
| Chr10 | 5 | 1 | 4 | 0.003512 | <i>BCR</i>      | Breakpoint cluster region protein                                                                   |
| Chr15 | 5 | 0 | 5 | 2.20E-16 | <i>VCP</i>      | Transitional endoplasmic reticulum ATPase                                                           |
| Chr14 | 5 | 0 | 5 | 7.67E-16 | <i>RCN1</i>     | Reticulocalbin-1                                                                                    |
| Chr7  | 5 | 0 | 5 | 3.20E-15 | <i>LTBR2</i>    | Leukotriene B4 receptor 2                                                                           |
| Chr19 | 5 | 0 | 5 | 4.65E-15 | <i>TIMM13</i>   | Mitochondrial import inner membrane translocase subunit Tim13                                       |
| Chr14 | 5 | 0 | 5 | 5.77E-13 | <i>CRTAM</i>    | Cytotoxic and regulatory T-cell molecule                                                            |
| Chr7  | 5 | 0 | 5 | 7.18E-12 | <i>SIN3A</i>    | Paired amphipathic helix protein Sin3a                                                              |
| ChrX  | 5 | 0 | 5 | 6.16E-11 | <i>VGLL1</i>    | Transcription cofactor vestigial-like protein 1                                                     |
| Chr14 | 5 | 0 | 5 | 1.34E-09 | <i>STX5</i>     | Syntaxin-5                                                                                          |
| Chr6  | 5 | 0 | 5 | 1.34E-09 | <i>FBLL1</i>    | rRNA/tRNA 2'-O-methyltransferase fibrillarin-like protein 1                                         |
| Chr2  | 5 | 0 | 5 | 2.38E-09 | <i>IP6K2</i>    | Inositol hexakisphosphate kinase 2                                                                  |
| Chr1  | 5 | 0 | 5 | 4.84E-09 | <i>TSACC</i>    | TSSK6-activating co-chaperone protein                                                               |
| Chr6  | 5 | 0 | 5 | 2.91E-08 | <i>MRPL22</i>   | 39S ribosomal protein L22, mitochondrial                                                            |
| Chr1  | 5 | 0 | 5 | 1.10E-07 | <i>LRRC40</i>   | Leucine-rich repeat-containing protein 40                                                           |
| Chr10 | 5 | 0 | 5 | 6.89E-07 | <i>SF3A1</i>    | Splicing factor 3A subunit 1                                                                        |
| Chr1  | 5 | 0 | 5 | 1.15E-06 | <i>ZNF326</i>   | DBIRD complex subunit ZNF326                                                                        |
| Chr1  | 5 | 0 | 5 | 1.15E-06 | <i>ARV1</i>     | Protein ARV1                                                                                        |
| Chr19 | 5 | 0 | 5 | 4.05E-06 | <i>TGFB1</i>    | Transforming growth factor beta-1                                                                   |
| Chr7  | 5 | 0 | 5 | 7.10E-06 | <i>CPSF2</i>    | Cleavage and polyadenylation specificity factor subunit 2                                           |
| Chr1  | 5 | 0 | 5 | 8.99E-06 | <i>AHDC1</i>    | AT-hook DNA-binding motif-containing protein 1                                                      |
| Chr20 | 5 | 0 | 5 | 1.20E-05 | <i>TXNL4B</i>   | Thioredoxin-like protein 4B                                                                         |
| Chr12 | 5 | 0 | 5 | 3.05E-05 | <i>SMARCAL1</i> | SWI/SNF-related matrix-associated actin-dependent regulator of chromatin subfamily A-like protein 1 |

|       |   |   |   |          |                |                                                   |
|-------|---|---|---|----------|----------------|---------------------------------------------------|
| Chr10 | 5 | 0 | 5 | 3.06E-05 | <i>SPATA2</i>  | Spermatogenesis-associated protein 2              |
| Chr19 | 5 | 0 | 5 | 0.0002   | <i>FSTL3</i>   | Follistatin-related protein 3                     |
| Chr20 | 5 | 0 | 5 | 0.000367 | <i>ORC6</i>    | Origin recognition complex subunit 6              |
| Chr16 | 5 | 0 | 5 | 0.000485 | <i>COIL</i>    | Coilin                                            |
| Chr1  | 5 | 0 | 5 | 0.000633 | <i>ADGRL4</i>  | Adhesion G protein-coupled receptor L4            |
| Chr2  | 4 | 4 | 0 | 5.68E-07 | <i>CFAP44</i>  | Cilia- and flagella-associated protein 44         |
| ChrX  | 4 | 4 | 0 | 0.0002   | <i>FRMPD4</i>  | FERM and PDZ domain-containing protein 4          |
| Chr19 | 4 | 4 | 0 | 0.000273 | <i>ICAM1</i>   | Intercellular adhesion molecule 1                 |
| Chr1  | 4 | 4 | 0 | 0.000327 | <i>CFAP74</i>  | Cilia- and flagella-associated protein 74         |
| Chr15 | 4 | 4 | 0 | 0.00163  | <i>DENND4C</i> | DENN domain-containing protein 4C                 |
| Chr8  | 4 | 4 | 0 | 0.001988 | <i>KCNU1</i>   | Potassium channel subfamily U member 1            |
| Chr20 | 4 | 4 | 0 | 0.009006 | <i>PRMT7</i>   | Protein arginine N-methyltransferase 7            |
| Chr13 | 4 | 3 | 1 | 5.98E-08 | <i>ODC1</i>    | Ornithine decarboxylase                           |
| Chr13 | 4 | 3 | 1 | 2.45E-07 | <i>PUM2</i>    | Pumilio homolog 2                                 |
| ChrX  | 4 | 3 | 1 | 1.89E-06 | <i>FRMPD3</i>  | FERM and PDZ domain-containing protein 3          |
| Chr18 | 4 | 3 | 1 | 1.52E-05 | <i>OSBPL1A</i> | Oxysterol-binding protein-related protein 1       |
| Chr5  | 4 | 3 | 1 | 0.000143 | <i>PTPN11</i>  | Tyrosine-protein phosphatase non-receptor type 11 |
| Chr4  | 4 | 3 | 1 | 0.000315 | <i>DTNBP1</i>  | Dysbindin                                         |
| ChrX  | 4 | 3 | 1 | 0.000436 | <i>SHROOM2</i> | Protein Shroom2                                   |
| Chr13 | 4 | 3 | 1 | 0.001327 | <i>PRR30</i>   | Proline-rich protein 30                           |
| Chr8  | 4 | 3 | 1 | 0.001349 | <i>WDR97</i>   | WD repeat-containing protein 97                   |
| ChrX  | 4 | 3 | 1 | 0.004934 | <i>FAM47C</i>  | Putative protein FAM47C                           |
| Chr16 | 4 | 2 | 2 | 1.63E-13 | <i>AKAP1</i>   | A-kinase anchor protein 1, mitochondrial          |
| ChrX  | 4 | 2 | 2 | 3.11E-10 | <i>P2RY10</i>  | Putative P2Y purinoceptor 10                      |
| Chr13 | 4 | 2 | 2 | 1.16E-06 | <i>MSH6</i>    | DNA mismatch repair protein Msh6                  |
| Chr2  | 4 | 2 | 2 | 2.17E-05 | <i>PLXNB1</i>  | Plexin-B1                                         |
| Chr19 | 4 | 2 | 2 | 7.48E-05 | <i>ZNF570</i>  | Zinc finger protein 570                           |
| Chr16 | 4 | 2 | 2 | 0.0002   | <i>GGA3</i>    | ADP-ribosylation factor-binding protein GGA3      |

|       |   |   |   |          |                |                                                        |
|-------|---|---|---|----------|----------------|--------------------------------------------------------|
| Chr12 | 4 | 2 | 2 | 0.001035 | <i>SCLY</i>    | Selenocysteine lyase                                   |
| Chr18 | 4 | 2 | 2 | 0.003063 | <i>CCDC178</i> | Coiled-coil domain-containing protein 178              |
| Chr5  | 4 | 2 | 2 | 0.004918 | <i>RELL1</i>   | RELT-like protein 1                                    |
| Chr10 | 4 | 2 | 2 | 0.004934 | <i>GGT1</i>    | Gamma-glutamyltranspeptidase 1                         |
| Chr2  | 4 | 1 | 3 | 2.20E-16 | <i>GSK3B</i>   | Glycogen synthase kinase-3 beta                        |
| Chr15 | 4 | 1 | 3 | 6.82E-15 | <i>FAM214B</i> | Protein FAM214B                                        |
| ChrY  | 4 | 1 | 3 | 1.89E-11 | <i>TSPY10</i>  | Testis-specific Y-encoded protein 10                   |
| Chr14 | 4 | 1 | 3 | 1.34E-09 | <i>OTUB1</i>   | Ubiquitin thioesterase OTUB1                           |
| Chr10 | 4 | 1 | 3 | 2.38E-09 | <i>CSDC2</i>   | Cold shock domain-containing protein C2                |
| Chr1  | 4 | 1 | 3 | 4.30E-08 | <i>MRPL55</i>  | 39S ribosomal protein L55, mitochondrial               |
| Chr1  | 4 | 1 | 3 | 4.30E-08 | <i>HFE2</i>    | Hemojuvelin                                            |
| Chr14 | 4 | 1 | 3 | 1.17E-07 | <i>TTC9C</i>   | Tetratricopeptide repeat protein 9C                    |
| Chr16 | 4 | 1 | 3 | 1.87E-07 | <i>MED24</i>   | Mediator of RNA polymerase II transcription subunit 24 |
| Chr11 | 4 | 1 | 3 | 2.08E-06 | <i>Phlda1</i>  | Pleckstrin homology-like domain family A member 1      |
| Chr14 | 4 | 1 | 3 | 2.21E-06 | <i>FADS1</i>   | Fatty acid desaturase 1                                |
| Chr1  | 4 | 1 | 3 | 2.21E-06 | <i>LRIF1</i>   | Ligand-dependent nuclear receptor-interacting factor 1 |
| Chr20 | 4 | 1 | 3 | 1.05E-05 | <i>ATXN1L</i>  | Ataxin-1-like                                          |
| ChrX  | 4 | 1 | 3 | 2.23E-05 | <i>CXorf23</i> | Uncharacterized protein CXorf23                        |
| Chr10 | 4 | 1 | 3 | 0.000143 | <i>GAS2L1</i>  | GAS2-like protein 1                                    |
| Chr2  | 4 | 1 | 3 | 0.0002   | <i>DAG1</i>    | Dystroglycan                                           |
| Chr20 | 4 | 1 | 3 | 0.000203 | <i>CCDC113</i> | Coiled-coil domain-containing protein 113              |
| Chr2  | 4 | 1 | 3 | 0.000273 | <i>VTCN1</i>   | V-set domain-containing T-cell activation inhibitor 1  |
| Chr13 | 4 | 1 | 3 | 0.000315 | <i>ATRAID</i>  | All-trans retinoic acid-induced differentiation factor |
| Chr16 | 4 | 1 | 3 | 0.000315 | <i>NDUFS5</i>  | NADH dehydrogenase [ubiquinone] iron-sulfur protein 5  |
| Chr19 | 4 | 1 | 3 | 0.000367 | <i>KCNK6</i>   | Potassium channel subfamily K member 6                 |
| Chr16 | 4 | 1 | 3 | 0.000471 | <i>IFI35</i>   | Interferon-induced 35 kDa protein                      |
| Chr14 | 4 | 1 | 3 | 0.000485 | <i>TUT1</i>    | Speckle targeted PIP5K1A-regulated poly(A) polymerase  |
| Chr16 | 4 | 1 | 3 | 0.000801 | <i>MTMR4</i>   | Myotubularin-related protein 4                         |

|       |   |   |   |          |                 |                                                                                    |
|-------|---|---|---|----------|-----------------|------------------------------------------------------------------------------------|
| Chr6  | 4 | 1 | 3 | 0.004918 | <i>WDR70</i>    | WD repeat-containing protein 70                                                    |
| Chr20 | 4 | 1 | 3 | 0.004918 | <i>MLST8</i>    | Target of rapamycin complex subunit LST8                                           |
| Chr9  | 4 | 1 | 3 | 0.009066 | <i>NEBL</i>     | Nebulette                                                                          |
| Chr15 | 4 | 0 | 4 | 2.20E-16 | <i>TEKT4</i>    | Tektin-4                                                                           |
| Chr3  | 4 | 0 | 4 | 3.16E-10 | <i>Tra2a</i>    | Transformer-2 protein homolog alpha                                                |
| Chr1  | 4 | 0 | 4 | 6.28E-09 | <i>WDTC1</i>    | WD and tetratricopeptide repeats protein 1                                         |
| Chr7  | 4 | 0 | 4 | 4.30E-08 | <i>CIB1</i>     | Calcium and integrin-binding protein 1                                             |
| Chr16 | 4 | 0 | 4 | 2.58E-07 | <i>MRPL45</i>   | 39S ribosomal protein L45, mitochondrial                                           |
| Chr19 | 4 | 0 | 4 | 7.67E-07 | <i>ZNF569</i>   | Zinc finger protein 569                                                            |
| Chr1  | 4 | 0 | 4 | 7.67E-07 | <i>PIGC</i>     | Phosphatidylinositol N-acetylglucosaminyltransferase subunit C                     |
| Chr2  | 4 | 0 | 4 | 4.05E-06 | <i>NCKIPSD</i>  | NCK-interacting protein with SH3 domain                                            |
| Chr16 | 4 | 0 | 4 | 4.71E-06 | <i>SLC16A11</i> | Monocarboxylate transporter 11                                                     |
| ChrY  | 4 | 0 | 4 | 5.04E-06 | <i>CDY2A</i>    | Testis-specific chromodomain protein Y 2                                           |
| Chr11 | 4 | 0 | 4 | 5.04E-06 | <i>FAM60A</i>   | Protein FAM60A                                                                     |
| Chr8  | 4 | 0 | 4 | 1.20E-05 | <i>SPIDR</i>    | DNA repair-scaffolding protein                                                     |
| Chr15 | 4 | 0 | 4 | 1.20E-05 | <i>UBQLN1</i>   | Ubiquilin-1                                                                        |
| Chr19 | 4 | 0 | 4 | 1.20E-05 | <i>MATK</i>     | Megakaryocyte-associated tyrosine-protein kinase                                   |
| Chr9  | 4 | 0 | 4 | 1.94E-05 | <i>DEPP</i>     | Protein DEPP                                                                       |
| Chr16 | 4 | 0 | 4 | 4.21E-05 | <i>HCRT</i>     | Orexin                                                                             |
| Chr17 | 4 | 0 | 4 | 4.21E-05 | <i>EXOSC8</i>   | Exosome complex component RRP43                                                    |
| Chr18 | 4 | 0 | 4 | 0.000101 | <i>MPPE1</i>    | Metallophosphoesterase 1                                                           |
| Chr19 | 4 | 0 | 4 | 0.000126 | <i>ZNF570</i>   | Zinc finger protein 570                                                            |
| Chr5  | 4 | 0 | 4 | 0.000143 | <i>GATB</i>     | Glutamyl-tRNA(Gln) amidotransferase subunit B, mitochondrial                       |
| Chr13 | 4 | 0 | 4 | 0.000315 | <i>MTHFD2</i>   | Bifunctional methylenetetrahydrofolate dehydrogenase/cyclohydrolase, mitochondrial |
| Chr3  | 4 | 0 | 4 | 0.000471 | <i>BAZ1B</i>    | Tyrosine-protein kinase BAZ1B                                                      |
| Chr20 | 4 | 0 | 4 | 0.000471 | <i>C16orf70</i> | UPF0183 protein C16orf70                                                           |
| Chr2  | 4 | 0 | 4 | 0.000471 | <i>MRPL47</i>   | 39S ribosomal protein L47, mitochondrial                                           |
| Chr16 | 4 | 0 | 4 | 0.000682 | <i>KCTD2</i>    | BTB/POZ domain-containing protein KCTD2                                            |

|       |   |   |   |          |                 |                                          |
|-------|---|---|---|----------|-----------------|------------------------------------------|
| Chr1  | 4 | 0 | 4 | 0.000682 | <i>TCTEX1D4</i> | Tctex1 domain-containing protein 4       |
| Chr14 | 4 | 0 | 4 | 0.000963 | <i>MRPL49</i>   | 39S ribosomal protein L49, mitochondrial |
| Chr10 | 4 | 0 | 4 | 0.002361 | <i>PI4KA</i>    | Phosphatidylinositol 4-kinase alpha      |
| Chr7  | 4 | 0 | 4 | 0.002361 | <i>ADSSL1</i>   | Adenylosuccinate synthetase isozyme 1    |
| Chr3  | 4 | 0 | 4 | 0.003063 | <i>SLC25A40</i> | Solute carrier family 25 member 40       |
| Chr7  | 4 | 0 | 4 | 0.00391  | <i>SSTR1</i>    | Somatostatin receptor type 1             |
| Chr8  | 4 | 0 | 4 | 0.004918 | <i>Sorbs3</i>   | Vinexin                                  |

---

**Table S17. Gene ontology enrichment analyses based on the 195 PSGs identified in the comparison *fascicularis-silenus* versus *sinica* group.** The top 40 most significant categories ( $P$ -value <0.05) from the over-representation analysis are reported. The categories related to reproductive functions are highlighted in bold.

| GeneSet ID        | Description                                              | Enrichment Ratio | P-value                 | Database              | No. of genes | Genes                                                                                                                                                          |
|-------------------|----------------------------------------------------------|------------------|-------------------------|-----------------------|--------------|----------------------------------------------------------------------------------------------------------------------------------------------------------------|
| GO:0006661        | Phosphatidylinositol biosynthetic process                | 5.280865         | 3.76E-04                | Biological_Process    | 7            | <i>PIGO;PITPNM1;PTPN11;MTMR4;PIGC;MPPE1;PI4KA</i>                                                                                                              |
| HP:0003307        | Hyperlordosis                                            | 5.039257         | 4.99E-04                | Human_Ontology        | 7            | <i>HERC1;BCR;VCP;TGFB1;SMARCAL1;DAG1;BAZ1B</i>                                                                                                                 |
| HP:0100785        | Insomnia                                                 | 18.35729         | 5.42E-04                | Human_Ontology        | 3            | <i>SIN3A;HCRT;BAZ1B</i>                                                                                                                                        |
| GO:1902074        | Response to salt                                         | 17.39112         | 6.40E-04                | Biological_Process    | 3            | <i>ZC3H12A;GHSR;TGFB1</i>                                                                                                                                      |
| GO:0007010        | Cytoskeleton organization                                | 2.033423         | 6.77E-04                | Biological_Process    | 24           | <i>EML2;SHROOM3;TOGARAM1;GHSR;PAK5;EPHA1;AKA P13;FMNL3;BCR;VCP;TGFB1;CFAP44;FRMPD4;ICAM1 ;CFAP74;DTNBP1;SHROOM2;PLXNB1;GSK3B;DAG1;M LST8;NEBL;CIB1;NCKIPSD</i> |
| GO:0030220        | Platelet formation                                       | 16.52156         | 7.47E-04                | Biological_Process    | 3            | <i>MPL;PTPN11;CIB1</i>                                                                                                                                         |
| HP:0005506        | Chronic myelogenous leukemia                             | 44.0575          | 8.05E-04                | Human_Ontology        | 2            | <i>MPL;BCR</i>                                                                                                                                                 |
| GO:0002513        | Tolerance induction to self antigen                      | 44.0575          | 8.05E-04                | Biological_Process    | 2            | <i>AIRE;TGFB1</i>                                                                                                                                              |
| GO:0036344        | Platelet morphogenesis                                   | 15.73482         | 8.66E-04                | Biological_Process    | 3            | <i>MPL;PTPN11;CIB1</i>                                                                                                                                         |
| HP:0001760        | Abnormality of the foot                                  | 2.219227         | 9.31E-04                | Human_Ontology        | 19           | <i>PRG4;NEK9;COL5A2;PIGO;ZFYVE27;HERC1;PROKR2; RPGRI1;DDHD1;TRIP4;BCR;VCP;SIN3A;TGFB1;ORC6 ;PRMT7;DAG1;BAZ1B;PI4KA</i>                                         |
| GO:0001954        | Positive regulation of cell-matrix adhesion              | 8.8115           | 0.0010889<br>63         | Biological_Process    | 4            | <i>EPHA1;GSK3B;DAG1;CIB1</i>                                                                                                                                   |
| HP:0004859        | Amegakaryocytic thrombocytopenia                         | 36.71458         | 0.0011996<br>9          | Human_Ontology        | 2            | <i>MPL;PTPN11</i>                                                                                                                                              |
| GO:0090325        | Regulation of locomotion involved in locomotory behavior | 36.71458         | 0.0011996<br>9          | Biological_Process    | 2            | <i>VPS35;GHSR</i>                                                                                                                                              |
| GO:0046488        | Phosphatidylinositol metabolic process                   | 3.765598         | 0.0013570<br>66         | Biological_Process    | 8            | <i>PIGO;PITPNM1;IP6K2;PTPN11;MTMR4;PIGC;MPPE1;P I4KA</i>                                                                                                       |
| HP:0002814        | Abnormality of the lower limb                            | 2.03253          | 0.0015091<br>34         | Human_Ontology        | 21           | <i>PRG4;NEK9;COL5A2;PIGO;ZFYVE27;HERC1;PROKR2; RPGRI1;DDHD1;TRIP4;BCR;VCP;SIN3A;TGFB1;SMAR CAL1;ORC6;PRMT7;DAG1;BAZ1B;PI4KA;ADSSL1</i>                         |
| <b>HP:0000134</b> | <b>Female hypogonadism</b>                               | <b>12.70889</b>  | <b>0.0016379<br/>76</b> | <b>Human_Ontology</b> | <b>3</b>     | <b><i>AIRE;PROKR2;PRLR</i></b>                                                                                                                                 |
| GO:0045830        | Positive regulation of isotype switching                 | 12.70889         | 0.0016379<br>76         | Biological_Process    | 3            | <i>TP53BP1;TGFB1;MSH6</i>                                                                                                                                      |

|                   |                                                                                              |                 |                         |                       |          |                                                                                                                                                                                |
|-------------------|----------------------------------------------------------------------------------------------|-----------------|-------------------------|-----------------------|----------|--------------------------------------------------------------------------------------------------------------------------------------------------------------------------------|
| GO:0097327        | Response to antineoplastic agent                                                             | 5.85871         | 0.0016607<br>32         | Biological_Process    | 5        | <i>ZC3H12A;GHSR;TGFB1;ICAM1;SPIDR</i>                                                                                                                                          |
| GO:1903003        | Positive regulation of protein deubiquitination                                              | 31.46964        | 0.0016695<br>54         | Biological_Process    | 2        | <i>ZC3H12A;VCP</i>                                                                                                                                                             |
| GO:0022603        | Regulation of anatomical structure morphogenesis                                             | 2.103247        | 0.0017350<br>37         | Biological_Process    | 19       | <i>ZC3H12A;COL5A2;VPS35;ZFYVE27;SHROOM3;GHSR;E<br/>PHA1;AKAP13;DDHD1;FMNL3;SP6;MPL;BCR;TGFB1;I<br/>CAM1;PLXNB1;GSK3B;DAG1;CIB1</i>                                             |
| GO:1990778        | protein localization to cell periphery                                                       | 3.293335        | 0.0017457<br>39         | Biological_Process    | 9        | <i>VPS35;ZFYVE27;GHSR;TGFB1;DENND4C;GGA3;DAG1;<br/>CIB1;C16orf70</i>                                                                                                           |
| HP:0010674        | Abnormality of the curvature of the vertebral column                                         | 2.268082        | 0.0019111<br>51         | Human_Ontology        | 16       | <i>NEK9;COL5A2;HERC1;LMNB2;DDHD1;TRIP4;LARP7;M<br/>PL;BCR;VCP;SIN3A;TGFB1;SMARCAL1;PTPN11;DAG1;<br/>BAZ1B</i>                                                                  |
| HP:0005922        | Abnormal hand morphology                                                                     | 3.553024        | 0.0019559<br>95         | Human_Ontology        | 8        | <i>NEK9;PIGO;HERC1;PSMD12;LMNB2;BCR;SIN3A;PI4KA</i>                                                                                                                            |
| <b>HP:0000137</b> | <b>Abnormality of the ovary</b>                                                              | <b>3.933705</b> | <b>0.0021090<br/>84</b> | <b>Human_Ontology</b> | <b>7</b> | <b><i>AIRE;PROKR2;PRLR;PTPN11;MSH6;SPIDR;BAZ1B</i></b>                                                                                                                         |
| GO:0002562        | Somatic diversification of immune receptors via germline recombination within a single locus | 7.342917        | 0.0021495<br>83         | Biological_Process    | 4        | <i>TCF7;TP53BP1;TGFB1;MSH6</i>                                                                                                                                                 |
| GO:0016444        | Somatic cell DNA recombination                                                               | 7.342917        | 0.0021495<br>83         | Biological_Process    | 4        | <i>TCF7;TP53BP1;TGFB1;MSH6</i>                                                                                                                                                 |
| HP:0011729        | Abnormality of joint mobility                                                                | 2.169691        | 0.0022061<br>23         | Human_Ontology        | 17       | <i>PRG4;NEK9;COL5A2;HERC1;PROKR2;TRIP4;BCR;VCP;<br/>SIN3A;TGFB1;ORC6;PTPN11;MSH6;DAG1;EXOSC8;BAZ<br/>1B;PI4KA</i>                                                              |
| HP:0005558        | Chronic leukemia                                                                             | 27.53594        | 0.0022128<br>13         | Human_Ontology        | 2        | <i>MPL;BCR</i>                                                                                                                                                                 |
| GO:0060312        | Regulation of blood vessel remodeling                                                        | 27.53594        | 0.0022128<br>13         | Biological_Process    | 2        | <i>BCR;TGFB1</i>                                                                                                                                                               |
| GO:1904468        | Negative regulation of tumor necrosis factor secretion                                       | 27.53594        | 0.0022128<br>13         | Biological_Process    | 2        | <i>ZC3H12A;GHSR</i>                                                                                                                                                            |
| GO:0035418        | Protein localization to synapse                                                              | 7.222541        | 0.0022843<br>77         | Biological_Process    | 4        | <i>VPS35;GHSR;BSN;DAG1</i>                                                                                                                                                     |
| HP:0040068        | Abnormality of limb bone                                                                     | 2.002614        | 0.0023323<br>68         | Human_Ontology        | 20       | <i>PRG4;NEK9;COL5A2;PIGO;HERC1;PSMD12;RPGRIPI;<br/>LMNB2;BCR;VCP;SIN3A;TGFB1;SMARCAL1;ORC6;PRM<br/>T7;PTPN11;DAG1;SPIDR;BAZ1B;PI4KA</i>                                        |
| HP:0040064        | Abnormality of limbs                                                                         | 1.822365        | 0.0024134<br>79         | Human_Ontology        | 25       | <i>PRG4;NEK9;COL5A2;PIGO;ZFYVE27;HERC1;PSMD12;<br/>PROKR2;RPGRIPI;LMNB2;DDHD1;TRIP4;BCR;VCP;SI<br/>N3A;TGFB1;SMARCAL1;ORC6;PRMT7;PTPN11;DAG1;S<br/>PIDR;BAZ1B;PI4KA;ADSSL1</i> |



|            |                                                                                              |          |                 |                    |    |                                                                                                                                                                                      |
|------------|----------------------------------------------------------------------------------------------|----------|-----------------|--------------------|----|--------------------------------------------------------------------------------------------------------------------------------------------------------------------------------------|
| HP:0012379 | Abnormal enzyme/coenzyme activity                                                            | 5.24494  | 0.0026979<br>99 | Human_Ontology     | 5  | <i>PIGO;BCR;VCP;TGFB1;DAG1</i>                                                                                                                                                       |
| GO:0033554 | Cellular response to stress                                                                  | 1.710856 | 0.0027292<br>26 | Biological_Process | 29 | <i>TEX12;CHD6;ZC3H12A;PIDD1;USP3;PAK5;NEIL1;AATF;TP53BP1;MPL;VCP;SIN3A;SMARCAL1;ICAM1;PTPN11;DTNBP1;MSH6;RELL1;GSK3B;OTUB1;FADS1;GAS2L1;DAG1;WDR70;MLST8;CIB1;SPIDR;UBQLN1;BAZ1B</i> |
| GO:0006506 | GPI anchor biosynthetic process                                                              | 10.65907 | 0.0027393<br>93 | Biological_Process | 3  | <i>PIGO;PIGC;MPPE1</i>                                                                                                                                                               |
| GO:0006974 | Cellular response to DNA damage stimulus                                                     | 2.186476 | 0.0027545<br>46 | Biological_Process | 16 | <i>TEX12;ZC3H12A;PIDD1;USP3;NEIL1;AATF;TP53BP1;VCP;SMARCAL1;PTPN11;MSH6;OTUB1;WDR70;CIB1;SPIDR;BAZ1B</i>                                                                             |
| GO:0098696 | Regulation of neurotransmitter receptor localization to postsynaptic specialization membrane | 24.47639 | 0.0028281<br>11 | Biological_Process | 2  | <i>GHSR;DAG1</i>                                                                                                                                                                     |
| GO:0033689 | Negative regulation of osteoblast proliferation                                              | 24.47639 | 0.0028281<br>11 | Biological_Process | 2  | <i>PLXNB1;ATRAID</i>                                                                                                                                                                 |
| GO:1990314 | Cellular response to insulin-like growth factor stimulus                                     | 24.47639 | 0.0028281<br>11 | Biological_Process | 2  | <i>GHSR;TGFB1</i>                                                                                                                                                                    |

---
